1 How the Easter Egg Weevils Got Their Spots: Phylogenomics  
2 reveals Müllerian Mimicry in *Pachyrhynchus* (Coleoptera,  
3 Curculionidae).  
4

5 Matthew H. Van Dam<sup>\*1,3</sup>, Analyn Anzano Cabras<sup>2</sup>, Athena W. Lam<sup>3</sup>  
6

7 <sup>1</sup>Entomology Department, Institute for Biodiversity Science and Sustainability, California Academy of  
8 Sciences, 55 Music Concourse Dr., San Francisco, CA 94118, USA  
9

10 <sup>2</sup>Coleoptera Research Center, Institute for Biodiversity and Environment, University of Mindanao, Matina,  
11 Davao City, 8000, Philippines  
12

13 <sup>3</sup>Center for Comparative Genomics, Institute for Biodiversity Science and Sustainability, California  
14 Academy of Sciences, 55 Music Concourse Dr., San Francisco, CA 94118, USA  
15

16 \*correspondence sent to: [mvandam@calacademy.org](mailto:mvandam@calacademy.org)  
17  
18

19 **ABSTRACT**

20 The evolutionary origins of mimicry in the Easter Egg weevil, *Pachyrhynchus*, have  
21 fascinated researchers since first noted more than a century ago by Alfred Russel  
22 Wallace. Müllerian mimicry, or mimicry in which two or more distasteful species look  
23 similar, is widespread throughout the animal kingdom. Given the varied but discrete  
24 color patterns in *Pachyrhynchus*, this genus presents one of the best opportunities to  
25 study the evolution of both perfect and imperfect mimicry. We analyzed more than  
26 10,000 UCE loci using a novel partitioning strategy to resolve the relationships of  
27 closely related species in the genus. Our results indicate that many of the mimetic color  
28 patterns observed in sympatric species are due to convergent evolution. We suggest  
29 that this convergence is driven by frequency-dependent selection.  
30  
31

## 32 INTRODUCTION

33

### 34 Mimicry as a driver of species diversification

35 Mimicry is central to evolutionary biology and has important implications for  
36 various evolutionary processes, such as adaptive radiation<sup>1</sup>, coevolution<sup>2</sup>, niche  
37 partitioning<sup>3,4</sup>, population structuring<sup>5</sup>, adaptation of chemical defense<sup>6</sup>. In particular,  
38 Müllerian mimicry is hypothesized to be a primary driver of diversification resulting from  
39 mutualistic evolution<sup>7-10</sup>. This type of mimicry describes an antipredator strategy for  
40 groups of unpalatable species—by sharing similar color and pattern, each individual  
41 prey experiences a lower probability of being mistaken as a food source by predators<sup>7</sup>.  
42 Müllerian mimicry and aposematism have been the subject of many fascinating studies  
43 in a wide range of taxa: butterflies<sup>11-13</sup>, net-winged beetles<sup>14</sup>, velvet ants<sup>15</sup>, spiny plants  
44<sup>16</sup>, dart frogs<sup>17,18</sup>, vipers<sup>19</sup>, coral snakes<sup>20</sup>, fish<sup>21</sup>, and possibly toxic birds<sup>22</sup>.

45 *Pachyrhynchus* is a diverse and charismatic group of beetles with elaborate  
46 patterning and iridescent colors (Figs. 1-2). Beetles in this genus have hard cuticles with  
47 fused elytra, which presents a line of defense against predation<sup>23,24</sup>, and they are  
48 hypothesized to be distasteful to their predators, which consist of birds, lizards, and  
49 frogs<sup>23,25</sup>. Their hard cuticle is derived in part through the bacteria endosymbiont  
50 *Nardonella*, which produces all precursors to tyrosine, a key amino acid for cuticular  
51 hardening<sup>26</sup>. *Pachyrhynchus* distinctive color patterns are structural colors produced by  
52 their scales' inner nanostructure which scatters incident light<sup>27</sup>.

53 Both Batesian and Müllerian mimicry are associated with and found within  
54 *Pachyrhynchus*. The first record of mimicry among Pachyrhynchini was noted by

55 Wallace<sup>28</sup> when he observed sympatric species with the same colors and elytral  
56 patterns. It was also noted by Schultze where he provided a list of 19 sympatric species  
57 of *Pachyrhynchus*, *Metapocyrtus* (also in the Pachyrhynchini), and *Doliops*  
58 (Cerambycidae), all sharing the same coloration and patterns between genera<sup>25,29</sup>. He  
59 reported 14 additional sympatric species of *Metapocyrtus* exhibiting very similar elytral  
60 patterns, only distinguishable from each other by close inspection of diagnostic  
61 characters of the rostrum<sup>29</sup>. Their distinctive patterns are also observed in other  
62 unrelated weevils (e.g., *Polycatus*, *Eupyrigops*, *Neopyrigops*, *Alcidodes*, *Coptorhynchus*,  
63 *Calidiopsis*). Following the typical Batesian model, long-horned beetles (e.g., *Doliops*,  
64 *Paradoliops*) and even a cricket mimic *Pachyrhynchus*' aposematic signals are thought  
65 to aid in avoiding predation<sup>28</sup>. In this study, we explore patterns of Müllerian mimicry in  
66 *Pachyrhynchus* through detailed study of the group's phylogenetics, biogeography, and  
67 ancestral state reconstructions.

68

### 69 *Pachyrhynchus*' natural history and taxonomy

70

71 The genus *Pachyrhynchus* was established based on the species  
72 *Pachyrhynchus moniliferus* from Luzon Island, Philippines, and placed in the tribe  
73 Pachyrhynchini (Germar). The tribe is entirely flightless with 18 described genera and  
74 more than 500 described species. *Pachyrhynchus* is endemic to oceanic islands but the  
75 entire genus is flightless. It is distributed in the Philippines (excluding Palawan), Ryukyu  
76 Island, Green and Orchid Island in Taiwan, and Talaud and Moluccas Island in  
77 Indonesia<sup>25,30,31</sup>, with the highest diversity in the Philippines. There are approximately

78 145 species of *Pachyrhynchus*, 93% of which are Philippine endemics<sup>25,32</sup>. Currently,  
79 despite the recent interest in the group<sup>31–35</sup>, *Pachyrhynchus* taxonomy and the  
80 relationships between different species remains poorly understood. Although naturalists  
81 and scientists have been collecting and describing *Pachyrhynchus* for centuries, there  
82 remains no concerted effort to study their phylogenetic relationships in a robust manner.  
83 While some species have been well quantified using morphometrics combined with  
84 DNA characters, the taxonomic scope of these studies are limited to only a few species  
85 found on Green and Orchid Islands of Taiwan<sup>33</sup>. The foundations of *Pachyrhynchus*  
86 taxonomy remains problematic, Heller<sup>36</sup> and Schultze<sup>25</sup> tried grouping species of  
87 *Pachyrhynchus* according to elytral color patterns. This was flawed because a  
88 heterogeneous set of unrelated species may lead to polyphyletic classifications. For  
89 example, classifications based on color pattern alone may cause over splitting of  
90 species because of intraspecific variation, or, conversely, over lumping of species  
91 because of convergent coloration and patterns. *Pachyrhynchus* species concepts  
92 remain largely untested by more complete morphological data and genetic data as well.  
93 We hope to provide a basic structure for the relationships within the genus to advance  
94 towards a more meaningful discussion on this group's mimicry and biology.

95

#### 96 *Biogeographic model*

97

98         The Pleistocene Aggregate Island Complex (PAIC) which has been used as a  
99 biogeographic framework in the Philippines for decades, refers groups of islands in the  
100 Philippines with less than -120 m isobath separation that coalesced in the Pleistocene

101 Epoch due to lowering of sea levels during glacial cycles<sup>37–42</sup>. These groups of islands  
102 are centers of biological endemism and share a high percentage of common floral and  
103 faunal elements. There are nine biogeographic subregions in the Philippines such as  
104 Batanes PAIC, Babuyan PAIC, Luzon PAIC, Mindoro PAIC, Romblon PAIC, Palawan  
105 PAIC, Mindanao PAIC and Sulu PAIC<sup>40</sup> of which the three largest biogeographically  
106 significant sub-provinces are Greater Luzon PAIC, Mindanao PAIC, and Greater  
107 Negros–Panay<sup>38</sup>. Studies on the distribution of mammals, birds, and herpetofauna have  
108 shown the consistency of PAIC boundaries on species distribution<sup>38,40</sup>. The  
109 connectedness of these islands allowed for the exchange of flora and fauna amongst  
110 the islands. The Philippines which has a unique geologic history including; paleo-island  
111 accretion, late Pleistocene sea-level fluctuations, and landmass connectivity has led to  
112 the isolation of lineages and restricted distributional patterns such as in the case of  
113 *Pachyrhynchus*.

114 Here, we use both dry pinned and newly collected specimens from the last 30  
115 years and more than 10,000 UCE loci to gain a more thorough understanding of the  
116 *Pachyrhynchus* mimetic system. Our results are the first well-supported phylogeny of  
117 this charismatic and threatened beetle genus.

118

119 We explore the following study questions:

120

121 1) Müllerian Mimicry - We aim to identify how sympatric *Pachyrhynchus* species  
122 with similar patterns acquired their coloration. We tested if their similarity is due

123 to inheritance alone or is the color pattern independently evolved in one or more  
124 sympatric lineages.

125 2) Intraspecific polymorphism - Some species of *Pachyrhynchus* display a striking  
126 polymorphism where some individuals possess solid maculations while others  
127 exhibit the same pattern but is not “filled” (i.e. same outline but lacking scales in  
128 the middle). We tested whether this trait is constrained to a single lineage within  
129 *Pachyrhynchus* or if it is more widespread throughout the genus.

130 3) Biogeography - Does *Pachyrhynchus* follow the Pleistocene Aggregate Island  
131 Complex (PAIC) hypothesis<sup>37,43,44</sup>, where speciation follows the interglacial  
132 periods when the land masses of the Philippines were at their most isolate in the  
133 last ~3MYA?

134

135

## 136 **METHODS**

137

### 138 DNA isolation and Quality Check

139

140 We used 71 pinned and 16 ethanol preserved specimens for this study. For a  
141 complete list of voucher specimens, see Supplemental Table S1. Voucher specimens  
142 are stored in two museum collections: the Coleoptera Research Center, University of  
143 Mindanao, Philippines (CRC) and the California Academy of Sciences, Entomology  
144 Department, USA (CASENT). To minimize contaminants, specimens were carefully  
145 dissected, excluding exoskeleton and beetle guts. In some specimens, contaminants

146 are apparent upon examination (e.g., yeast, fungus and mites are observed in the body  
147 cavity), in those cases legs were removed and punctured to allow enzymatic  
148 (proteinase-K) digestion of soft tissue. DNA was extracted from the resulting tissues  
149 using the QIAamp micro kit (Qiagen, Germany) following the manufacturer's protocol.  
150 We assessed the quantity of all isolated DNA using a Qubit 2.0 Fluorometer (Invitrogen,  
151 USA DNA quality (i.e., fragment size distributions) was determined using 1% agarose  
152 gel in newly collected specimens and historic samples with low starting concentrations,  
153 with a 2100 BioAnalyzer (Agilent Technologies, USA). We found that our starting DNA  
154 quality and quantity varied significantly among specimens: from 4.8 ng–5000 ng and  
155 200 bp–50 kbp. This is not surprising as collection dates and storage conditions of each  
156 specimen varied widely.

157 High molecular weight (HMW) DNA for 10X Genomics library construction was  
158 extracted from a single newly collected, dry frozen, *P. miltoni* specimen, using  
159 MagAttract HMW DNA Kit (Qiagen, Germany) and following manufacturer's protocol.  
160 DNA fragment size was quantified by pulsed-field capillary electrophoresis using the  
161 Femto Pulse System (Agilent Technologies, USA).

162

### 163 Library Construction

164

165 We obtained paired-end Illumina data from 85 whole genome libraries, and an  
166 additional three from another studies (Van Dam et al. 2021, in prep). When necessary,  
167 DNA was sheared using a Covaris M220 (Covaris Inc., USA). Libraries were  
168 constructed with the NEBNext® Ultra™II DNA Library Preparation kit (New England

169 Biolabs Inc, USA) following the manufacturer’s protocol. To minimize PCR replicates in  
170 the final dataset, titration of the number of PCR cycles was performed as described in  
171 Belton et al. 2012<sup>45</sup>. Average sizes of the final libraries were around 250 bp (for libraries  
172 constructed from historic samples) to 400 bp (for libraries constructed using newly  
173 collected material).

174

175 The 10X Genomics linked-read library for *Pachyrhynchus miltoni* was prepared at QB3  
176 Genomics at the University of California, Berkeley

177

### 178 Low Coverage Genome Assembly

179

180 First, we trimmed adapters and low quality bases from the ends of our reads with  
181 *fastp* version-0.20.0 using the “detect\_adapter\_for\_pe” setting<sup>46</sup>. Because we used two  
182 lanes of sequencing for some of our libraries, we concatenated the forward and reverse  
183 reads of these two lanes. We then concatenated unpaired reads into a single file for  
184 each species. Next, we used *SPAdes-3.11.1*<sup>47</sup> to assemble the reads into scaffolds with  
185 k-mer values of 21, 33, 55, 77, 99 and 127 in the *SPAdes* assembly pipeline, using  
186 default settings for everything other than the memory (“-m 800”) and cpu threads (“-t  
187 32”).

188

### 189 Genome Assembly of *Pachyrhynchus miltoni*

190



191 We used 594M illumina 2x150 paired reads which had been barcoded by the  
192 10X Genomics Chromium instrument. The 10X Genomics linked-read assembly was  
193 constructed with Supernova v2.0.1<sup>48</sup> with default settings.

194

#### 195 Ultraconserved Element (UCE) Marker Design

196

197 We designed a custom ultraconserved element (UCE) probe set using the  
198 PHYLUCE pipeline<sup>49,50</sup>. To maximize the effectiveness of the probes, we selected  
199 individuals that spanned the phylogenetic diversity of the Pachyrhynchini. For the base  
200 taxon, we used the chromosome level genome assembly of *Pachyrhynchus*  
201 *sulphureomaculatus* Schultz, 1922<sup>52</sup>. This taxon was used to select the initial bates  
202 because: 1) preliminary investigation of *P. sulphureomaculatus* indicated that it is not  
203 recovered at distal portions of the *Pachyrhynchus* phylogeny, which has been  
204 demonstrated to increase the number of UCE loci captured<sup>52</sup>, 2) the genome is  
205 complete and soft masked for repetitive elements, and 3) perhaps most important, the  
206 genome is free of contamination, which can lead to off-target loci capture (Van Dam et  
207 al. 2021, in prep). Soft masked genome is critical because the PHYLUCE pipeline only  
208 screens for repetitive DNA if the base genome is soft masked. If the genome is not soft  
209 masked, probes may be designed from paralogous loci. To diminish, as much as  
210 possible, the possibility of designing loci from non-target species in the probes  
211 themselves, we used a stringent screening method for our probes, selecting only loci  
212 that were recovered in our base taxon (Van Dam et al. 2021, in prep). We included  
213 eight *Pachyrhynchus* species from different species groups (Supplemental Figure S1).

214 We selected two outgroup species, close relatives to *Pachyrhynchus*: *Coptorhynchus*  
215 and *Oribius* (Celeuthetini)<sup>53</sup>, to ensure that the probe set is relatively universal across  
216 the phylogenetic diversity of our target species, for a total dataset of ten species.

217

### 218 *Extracting UCE Loci and Alignment Construction*

219

220 To match and extract our probe set from the *Pachyrhynchus* scaffolds and then  
221 align our loci we followed the PHYLUCE pipeline<sup>49</sup> using default settings unless  
222 otherwise noted. We used the PHYLUCE script  
223 “phyluce\_probe\_run\_multiple\_lastzs\_sqlite” with an “identity” of 60. After matching  
224 probes to scaffolds, we used “phyluce\_probe\_slice\_sequence\_from\_genomes” to  
225 extract the flanking 500 bases around our probes. After the initial alignment step using  
226 *mafft*<sup>54</sup> we used “phyluce\_align\_get\_trimal\_trimmed\_alignments\_from\_untrimmed” to  
227 internally trim our matrices. This step uses *trimAl*<sup>55</sup> to help trim ambiguously aligned  
228 sites in the alignments. We used “phyluce\_align\_get\_only\_loci\_with\_min\_taxa” to select  
229 loci with a minimum of 50% complete matrices. Lastly, we used  
230 “phyluce\_align\_format\_nexus\_files\_for\_raxm” to produce the final concatenated matrix.

231

### 232 *UCE Phylogenomics*

233

234 We used two different types of analyses for phylogenetic reconstruction: (1) a  
235 concatenated analysis using RAXML-NG v1.0.0<sup>56</sup>, and (2) a summary species tree  
236 analyses using ASTRAL-MP v5.7.4<sup>57,58</sup>.

237

238 Concatenated Phylogenetic Analyses

239

240 We used the General Time Reversible + gamma (GTRGAMMA) site rate  
241 substitution model across our alignment. We used 10 independent parsimony-based  
242 starting trees for our maximum-likelihood (ML) searches in RAxML-NG. Non-parametric  
243 bootstrap replicates (BS) were done using the autoMRE option, with a maximum of 200  
244 replicates to optimize the number of bootstrap replicates for this large dataset. Lastly,  
245 we mapped the bootstrap replicate values onto the best-scoring ML tree.

246

247 Species Tree Analyses

248

249 *Identifying UCE loci within genomic windows:* We used methodologies that are similar to  
250 Van Dam et al. 2020<sup>51</sup> for combining UCE loci. First, we identified UCE loci that are  
251 within 25 kb non-overlapping windows, as similar window sizes were used in Edelman  
252 et al. 2019<sup>59</sup>. To accomplish this, we divided up the base genome's chromosomes into  
253 25 kb non-overlapping windows using the “*tileGenome*” function in the *GenomicRanges*  
254 package<sup>60</sup> in *R*. Next, we extracted the genomic coordinates from these windows and  
255 the coordinates produced in PHYLUCE for the probe set, and then we identified  
256 overlapping ranges using the “*GRanges*” function in the *GenomicRanges* package. If  
257 there was a UCE that overlapped two windows, it was combined with the adjoining  
258 UCes to maximize the number of UCes within a window.

259

260 *Partitioning procedures:* Data preparation before partitioning and partitioning procedures  
261 were carried out following Van Dam et al. 2017<sup>62</sup>. Before we partitioned UCE loci, we  
262 first used the R package *ips*<sup>61</sup> with an R script from Van Dam et al. 2017<sup>62</sup>. We removed  
263 any columns composed exclusively of “-”, “n” and/or “?” using the “deleteEmptyCells”  
264 function, followed by removing any ragged ends of the matrix with the “trimEnds”  
265 function, with a minimum of four taxa present in the alignment. Below we expand on  
266 partitioning procedures to consider the potential site rate heterogeneity found in UCE  
267 loci as well as partition loci found in the same genomic window or potentially the same  
268 gene<sup>51</sup>. We use an alternative partitioning scheme from Van Dam et al. 2017 and  
269 Tagliacollo and Lanfear 2018<sup>62,63</sup>. Although the central core regions of UCEs tend to be  
270 more conserved than the flanking regions<sup>49,62–64</sup>, this observed amount of variability is  
271 greatly reduced due to internal trimming procedures in the PHYLUCE pipeline, which is  
272 necessary to accurately align loci. Internal trimming reduces the variability of informative  
273 sites to present a relatively even distribution across these loci<sup>64</sup>, essentially taking the  
274 U-shaped distribution and reducing it to a more or less flat line<sup>64</sup>. With this in mind, we  
275 unlinked the character sets of the flanking regions and used *PartitionFinder2* v2.1.1<sup>65</sup> to  
276 group these separate partitions based on the best fitting model and substitution rates for  
277 the data. First, we divided the loci into a central core region of 80 bp because some loci  
278 are reduced by internal trimming to be less than the original 160 bp of the probes. Next,  
279 we divided each of the flanking regions into 5 separate character sets based on their  
280 proportion of sequence length (5 to the left of the central core and 5 to the right). For  
281 the loci that shared genomic windows, we combined character sets; thus, if two loci  
282 were concatenated, there would be 22-character sets total. These character sets were

283 then input into *PartitionFinder2* for partitioning and model selection. Because RAxML-  
284 NG uses a more diverse set of nucleotide substitution models than previous versions of  
285 RAxML<sup>56</sup>, we tested for the best model fit from a total of 39 different models  
286 (Supplemental material, model list).

287

288 *Gene tree and species tree reconstruction:* We used ten independent parsimony-based  
289 starting trees for our maximum likelihood (ML) searches in RAxML-NG. We then  
290 performed 100 non-parametric bootstrap replicates, followed by mapping the bootstrap  
291 replicate values onto the best-scoring ML tree. Next, we collapsed/contracted branches  
292 in the gene trees with  $BS \leq 20$  using *newickutils*<sup>66</sup>; which has been demonstrated to  
293 have a strong positive impact on the accuracy of species tree reconstruction<sup>67,68</sup>. These  
294 resulting trees were used in species tree reconstruction. We used ASTRAL-MP with the  
295 default settings to reconstruct the species tree and annotate the tree with support  
296 values calculated for the normalized quartet support (NQS) and local posterior  
297 probability (LPP)<sup>69</sup>.

298

299 *Divergence Dating Biogeography*

300

301 We used MCMCTREE<sup>70</sup> to perform our divergence dating analyses. We used the  
302 topology from our ASTRAL analyses as the starting topology for the MCMCTREE. No  
303 fossils exist for our ingroup or near relatives, so we used a geological calibration for the  
304 maximum age of the Philippine Islands. We used 25–30 Ma as the root node of the  
305 Pachyrhynchini, an approximate date for the emergence of the Philippine proto-islands

306 proposed by Hall 2002. We used MCMCTreeR<sup>71</sup> to estimate a normal distribution around  
307 the maximum age of our calibration point as well as to format the tree file for  
308 MCMCTREE. Next, we used the aforementioned tree to obtain a rough estimate of the  
309 substitution rate using basml<sup>72</sup>. To help accomplish this, we randomly selected 300 loci,  
310 using many more will prevent the analysis from completing, as well as using more data  
311 is not necessary to approximate the uncertainty of the divergence dates<sup>72,73</sup>. Finally, we  
312 estimated the gradient and Hessian of the branch lengths<sup>74</sup> to assist in the final  
313 estimation of our divergence dates.

314 To reconstruct the broad scale biogeographical patterns of *Pachyrhynchus*, we  
315 used BioGeoBEARS v1.1.2<sup>75</sup>. Because biogeographic model selection is sensitive to  
316 duplicate taxa, we removed all potential duplicates from the same metapopulation  
317 lineage/species<sup>75</sup>. We wanted to examine if the biogeography followed the Pleistocene  
318 Aggregate Island Complex (PAIC) hypothesis<sup>37,43,44</sup>, and thus we defined our areas  
319 according to the PAIC scheme. Many of the defined areas are congruent with the  
320 various geological histories of the major island groups<sup>42,76–78</sup> (Fig. 4). We followed this  
321 scheme except for the island of Marinduque because it contains a number of unique  
322 species which do not have any obvious close relatives in the Luzon PAIC. For this  
323 island, we were curious to see its colonization history separate from the Luzon PAIC.  
324 We initially examined three different biogeographic models, DEC<sup>79</sup>, DIVA-like<sup>80</sup>,  
325 BAYAREA-like<sup>81</sup> (see Table 3), and also included the “+J” parameter for founder-  
326 event/jump speciation at cladogenesis events<sup>75</sup>. This parameter has been demonstrated  
327 to greatly improve model fit for island- and island-like systems<sup>75,82,83</sup>. We used the

328 Akaike information criterion corrected for sample size (AICc) to identify which model  
329 best explained our data given the number of free parameters.

330

### 331 *Ancestral State Reconstruction of Color Patterns*

332

333 To identify instances of mimicry and/or convergence in the color pattern of  
334 *Pachyrhynchus*, we used the R package *phytools* v0.7.70 “fitMk”<sup>84</sup> to reconstruct  
335 ancestral character states. We categorized the color pattern into 11 different states (Fig.  
336 5). We define 11 different color patterns on their elytra as follows: 1) “Black”, species  
337 whose integument is black or almost entirely black. 2) “Rainbow” elongate linear bands  
338 or elongate maculations that nearly touch composed of yellow/orange color at distal and  
339 apical ends gradually transitioning to blue in the center. 3) “Vertical bars” elongate linear  
340 bands or elongate maculations that nearly touch composed of a single color running the  
341 length of the elytra. 4) “Filled Moroccan tile”, large central patches of color with three  
342 apical and three distal areas not covered by colored scales. 5) “Open bands” three pairs  
343 of lines that circumscribe an ovoid shape or run the width of an elytra. 6) “Moroccan tile”  
344 net-like pattern of lines. 7) “Checker” two vertical lines near apex of elytra with a  
345 horizontal central line and two vertical lines near anterior end of elytra. 8) “Spots” at  
346 least three pairs of circular maculations. 9) “Irregular grid” two–four pairs of short  
347 convergent or parallel lines near apex, a central horizontal band, and two–four pairs of  
348 short convergent lines at the anterior end of the elytra. 10) “Vertical lines” narrow lines  
349 running the length of the elytra. 11) “Filled bands” three pairs of broad ovoid  
350 maculations running roughly the width of an elytra.

351 We then selected the best fitting model (equal rates ER, symmetric backward  
352 and forward rates SYM, or all-rates-different for transitions ARD) using the AIC weights  
353 as our selection criteria. All models treated character transitions as unordered. Next, we  
354 simulated 1000 different character histories using *phytools*' "make.simmap" function  
355 using the "mcmc" option to estimate the transition rate matrix, under our best fitting  
356 model. Lastly, because some *Pachyrhynchus* species possess discrete polymorphisms,  
357 we wanted to examine the history of this trait as well. The polymorphic trait in  
358 *Pachyrhynchus* presents itself as the color pattern being "filled" (solid center) or "open"  
359 (outlined) maculations (Fig. 4). The addition of this polymorphic state to the previous 11  
360 character states (Fig. 4) resulted in a transition matrix that was much too large to  
361 analyze. To examine how widespread open or filled maculations are across the  
362 phylogeny, we coded it as two different polymorphic states (filled, not filled, or species  
363 that have both states). We performed the same model selection and ancestral state  
364 reconstruction methods as above but using *phytools*' "fitpolyMk" and also included the  
365 model "transient", where the rates of gaining or losing polymorphic states differ. We  
366 combined this information with their biogeography to identify whether color patterns  
367 were due to inheritance (related species look alike via shared ancestry of trait),  
368 convergence (species look alike but independently evolve a trait in allopatry), or mimetic  
369 convergence (species look alike, and of those that are similar, at least one lineage  
370 independently evolved the trait in sympatry).

371

## 372 RESULTS

373



374 **Genome Assembly of *Pachyrhynchus miltoni***

375 The 10X Genomics linked-read assembly resulted in a total length of  
376 2,204,292,973 bp (roughly the same size as the *P. sulphureomaculatus* base  
377 genome<sup>51</sup>), with an N50 of 10,763 bp and 368,426 scaffolds. To use the assembly in  
378 PHYLUCE, we modified the headers of the scaffolds to resemble those from SPAdes,  
379 giving each a unique name and matching sequence length of the scaffold.

380

381 **Probe Design, Sequencing Results, and UCE Loci Recovery**

382

383 Our probe design selected a total of 12,522 UCE loci shared by all 11 taxa. Our  
384 sequencing results were largely successful with only one DNA library producing less  
385 than a million reads, and this sample was removed from all subsequent analyses.  
386 Filtering loci that contain  $\geq 50\%$  complete matrices resulted in 10,108 of 12,323 total loci  
387 recovered. We sequenced an average of  $77,990,397 \pm 11,627,118$  95% CI, paired reads  
388 per sample (Supplementary Fig. S2), with a final 50% complete matrix with a mean of  
389  $8,756 \pm 698$  95% CI per sample (Supplementary Fig. S2). These statistics exclude loci  
390 recovered from the long read or pseudo long read assemblies, which recovered an  
391 average of  $\sim 11,000$  UCEs (Supplementary Table S1). We found a total of 2,995 UCEs  
392 sets in 25 kb windows, with a total of 1,332 windows containing multiple UCEs and  
393 7,113 UCEs not in sets (Supplementary Fig. S2).

394

395

396

397

|                          |      |     |    |    |   |   |
|--------------------------|------|-----|----|----|---|---|
| Length of UCE sets       | 2    | 3   | 4  | 5  | 6 | 7 |
| Number of sets by length | 1087 | 184 | 44 | 11 | 4 | 2 |

398 **Table 1. Count of UCEs by the number of UCEs concatenated in a “set”.** Upper row gives the  
399 number of UCEs concatenated in a 25 kb non-overlapping window, and the lower row is the count by  
400 category.

401  
402  
403

| Loci type | ABS_mean | ABS_median | ABS_95%_CI | Number of loci |
|-----------|----------|------------|------------|----------------|
| Sets      | 55.4     | 58         | 0.67796    | 1332           |
| Singles   | 48.1     | 51.9       | 0.41227    | 7113           |

404 **Table 2. Average bootstrap support by locus type.** “Sets” are concatenated UCEs found in a 25kb  
405 non-overlapping sliding window bin, and “Singles” are those where only a single UCE occupies a 25kb bin  
406 in the *P. sulphureomaculatus* base genome.

407

## 408 ***Phylogenetic Analyses***

409 *Concatenated analysis:* Our alignment totaled 6,353,380 bp in length. The analysis  
410 completed 200 non-parametric bootstrap replicates, and we provided the phylogenetic  
411 hypothesis for the genus in Supplemental Fig 1S. BS support was relatively high  
412 throughout the tree (Supplementary Fig. S1), with strong support along the backbone  
413 (BS =100%). The genus *Pachyrhynchus* was recovered as monophyletic, but the genus  
414 *Metapocyrtus* was not. The genus *Pantorhytes* is sister to the Philippine members of the  
415 Pachyrhynchini, and the Celuthenini taxa are sister to Pachyrhynchini.

416

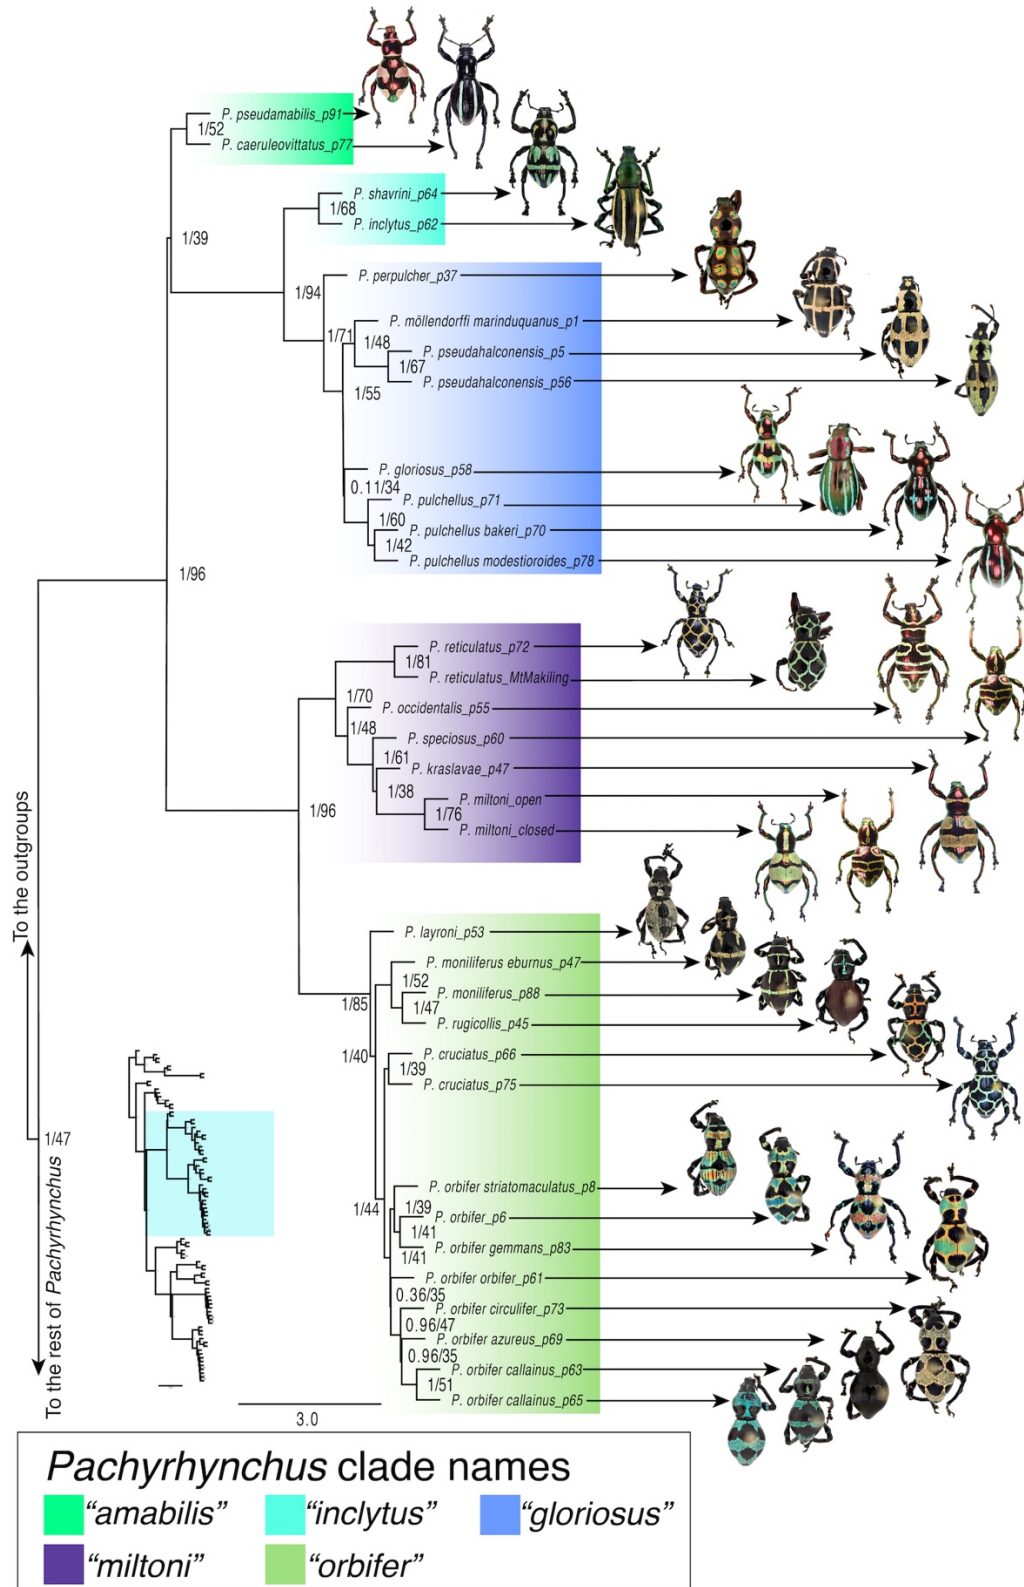

417  
418  
419  
420

**Figure 1. Phylogeny of the *Pachyrhynchus* ASTRAL species tree, part one.** The other half of the tree is found in Fig. 2. Node labels correspond to local posterior probability (LPP) and normalized quartet support (NQS).

421

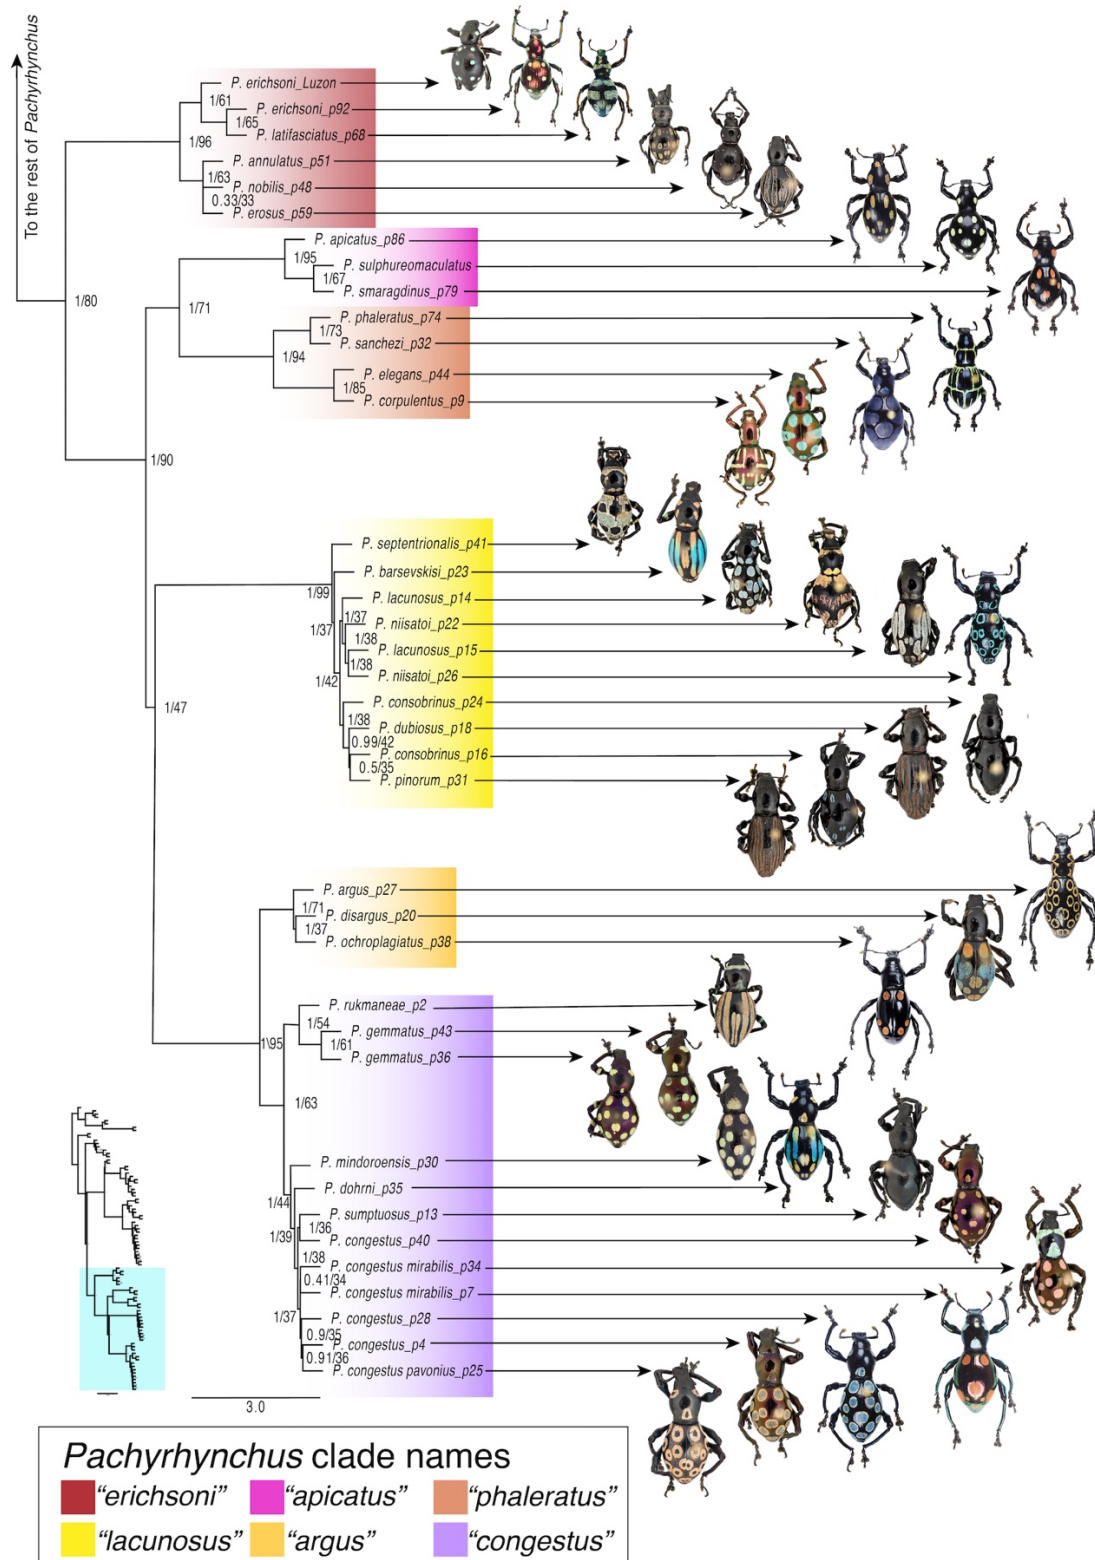

422

423

424

425

**Figure 2. Phylogeny of the *Pachyrhynchus* ASTRAL species tree, part two.** The other half of the tree is found in Fig. 1. Node labels correspond to local posterior probability (LPP) and normalized quartet support (NQS).

426  
427 *Species tree analyses:* We present the first genus wide phylogeny, and recovered 11  
428 major lineages (Figs. 1–2). We found surprising patterns that contradicts the idea that  
429 pattern alone is a sufficient character to group *Pachyrhynchus* species. For example, *P.*  
430 *speciosus*, previously described as a single species, was composed of several  
431 unrelated lineages<sup>85</sup>. In addition, *P. reticulatus* and *P. cruciatus* were actually rather  
432 distantly related despite similar “Moroccan tile” like patterns (Fig. 1).

433         The partitioning results of the gene trees showed that most UCEs require more  
434 than three partitions; with the mean number of partitions in single UCEs being  $3.6 \pm$   
435  $0.04$ , and the mean number of partitions in UCE sets  $17.8 \pm 0.65$ . These results indicate  
436 that UCE loci have different rates and models of nucleotide substitutions as well, not  
437 just a central core and symmetrically variable flanking regions. In addition, the  
438 substitution models selected were varied, with the traditional GTR+G selected second-  
439 most frequently (Fig.3). The topology of the species tree reconstructed with ASTRAL  
440 had an identical backbone to the tree from the concatenated analysis and only a few  
441 differences at nodes near the tips (Supplementary Fig. S3), but all species remained in  
442 the same clades (Figs. 1–2) in both trees. The local posterior probabilities (LPP)<sup>69</sup> were  
443 similar to the BS values of the RAxML-concatenated analysis, with high support along  
444 the backbone of the tree and lower support near the tips, where conflict between  
445 topologies was typically due to short internode distances (Supplementary Fig. S3).  
446 Normalized quartet support (NQS) values were similar to the other support values (Figs.  
447 1–2) with most of the gene trees congruent with the species tree topology along the  
448 backbone, as well as at nodes separated by relatively long internode distances.  
449 However, nodes separated by very short distances had more conflict among the gene

450 tree topologies, with only ~35–40% of the gene tree quartets in agreement. The number  
 451 of loci and our computer resources impaired the completion of the 100 BS replicates.  
 452 However, the statistics we used are a more reliable measure of gene tree conflict and  
 453 support for species trees<sup>69</sup>.

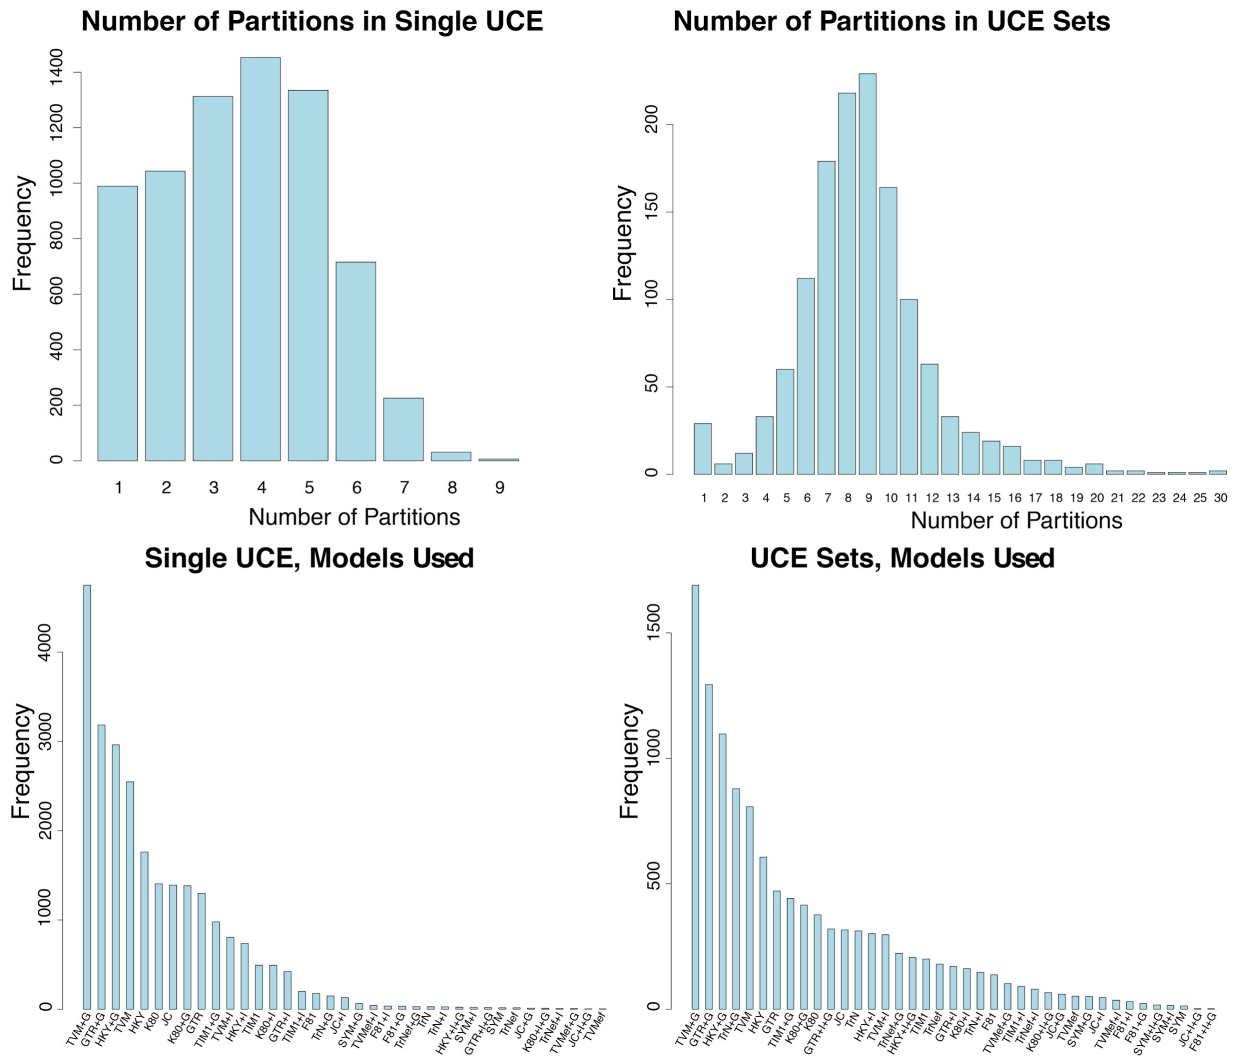

454 **Figure 3. Barplot of UCE loci partitioning results.** UCE “Sets” are concatenated UCES which occupy  
 455 a 25 kb non-overlapping sliding window bin, and “Singles” are those where only a single UCE occupies a  
 456 25 kb bin in the *P. sulphureomaculatus* base genome. Upper panels, barplot of the number of partitions  
 457 found in a UCE locus. Lower panels, barplot of the number of times a particular model of nucleotide  
 458 substitution was used in a partition.

461  
 462  
 463 *Divergence dating and Biogeography*

464

465           The results of the MCMCTREE analysis estimated the root age from the 95%  
466 highest posterior density (HPD) of *Pachyrhynchus* to be between 25.1–17.9 Ma. Most  
467 *Pachyrhynchus* species have diversified within the last 5 Ma, and many species' HPDs  
468 straddle the Pliocene-Pleistocene boundary (Fig. 4). The complete results of the  
469 MCMCTREE analyses are shown in Supplementary Fig. S4.

470           The results of the BioGeoBEARS analyses are shown in Table 3 and Fig. 4. The  
471 BioGeoBEARS analyses gave the greatest AICc model weight to the DEC+J model  
472 (Table 3). All models favored adding the founder event speciation parameter to the  
473 model, indicating that this mode of dispersal was significant in forming the broad scale  
474 biogeographic pattern of the genus. The root node of *Pachyrhynchus* was reconstructed  
475 as a joint range between Mindanao and Luzon. However, the descendant nodes were  
476 reconstructed as most likely Luzon. The subsequent radiations of lineages on Mindanao  
477 all descended from Luzon lineages. These separate Mindanao lineages represent five  
478 independent colonization events. The lineages of Mindoro, however, represent a mix of  
479 biogeographic lineages, three from Luzon and two from Mindanao. The single taxon  
480 from Panay represents a founder event from Luzon. Marinduque, although part of the  
481 Luzon PAIC, had two separate founder events one from Luzon and one from Mindoro.  
482 There was no evidence of back-colonization.

483

484

485

486

487

488

489

490

| Biogeographic model | LnL    | numparams | d        | e        | j     | AICc  | AICc_wt  |
|---------------------|--------|-----------|----------|----------|-------|-------|----------|
| DEC                 | -80.65 | 2         | 0.0069   | 1.00E-12 | 0     | 165.5 | 2.60E-10 |
| DEC+J               | -58.12 | 3         | 1.00E-12 | 1.00E-12 | 0.038 | 122.7 | 0.53     |
| DIVALIKE            | -74.52 | 2         | 0.0089   | 1.00E-12 | 0     | 153.2 | 1.20E-07 |
| DIVALIKE+J          | -58.85 | 3         | 1.00E-12 | 1.00E-12 | 0.039 | 124.1 | 0.25     |
| BAYAREALIKE         | -100.1 | 2         | 0.0058   | 0.058    | 0     | 204.5 | 9.00E-19 |
| BAYAREALIKE+J       | -59.01 | 3         | 1.00E-07 | 1.00E-12 | 0.038 | 124.4 | 0.22     |

491 **Table3. BioGeoBEARS model results table.**



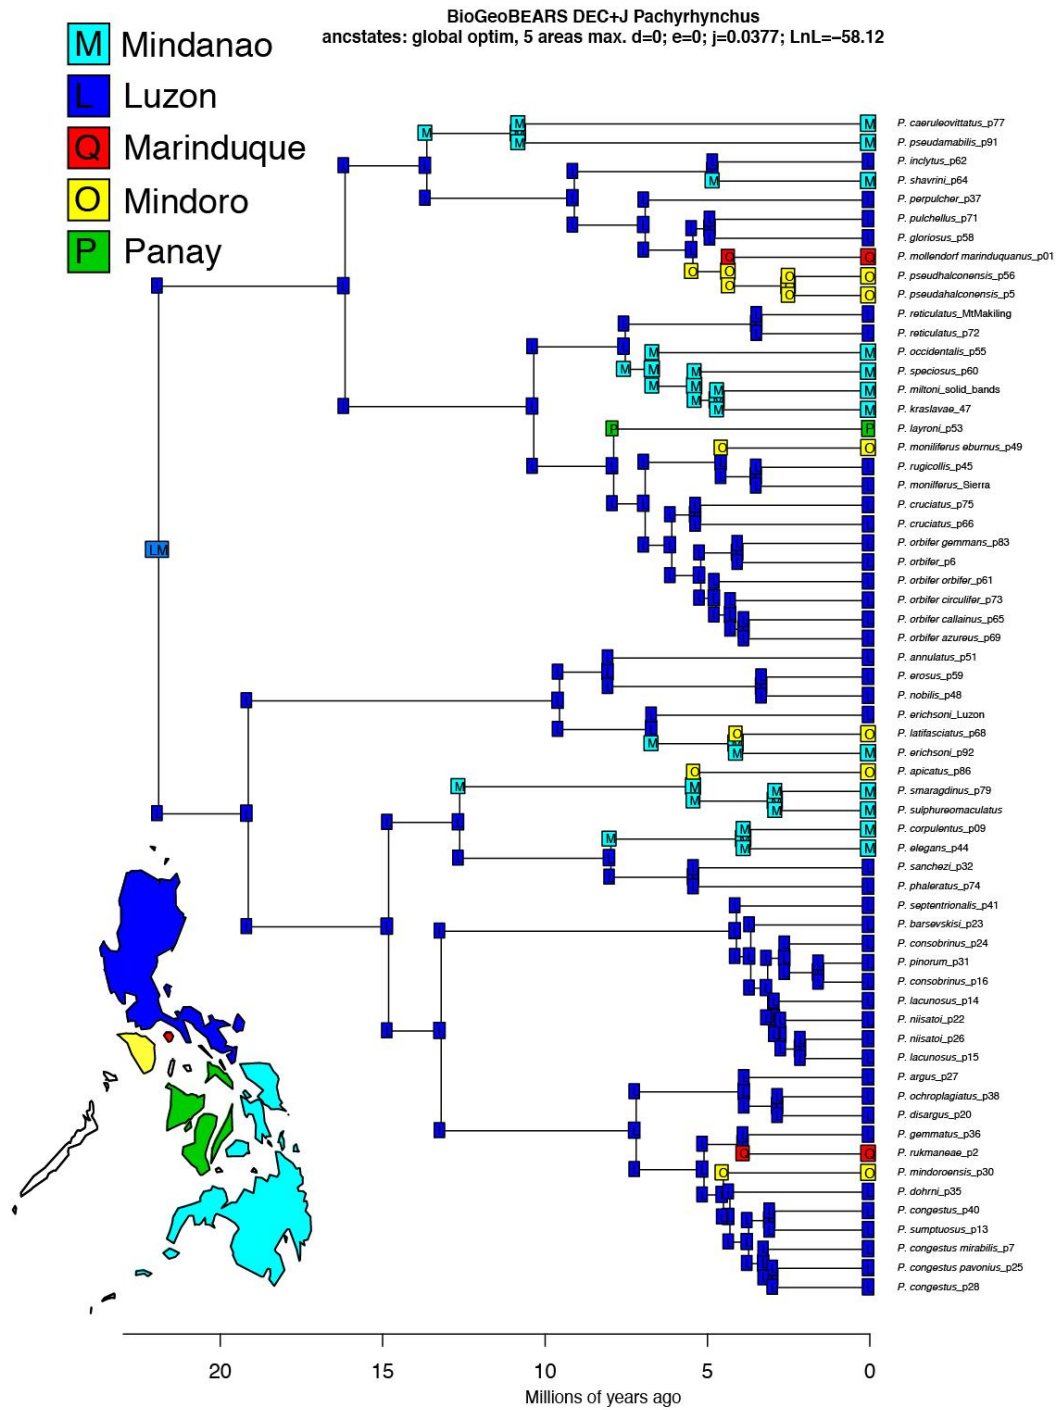

492

493 **Figure 4. Biogeographic ancestral area reconstruction using *BioGeoBEARS* “DEC+J” model for**

494 ***Pachyrhynchus*.** Color codes correspond to Pleistocene Aggregate Island Complex (PAIC). Lower left

495 color-coded map of the Philippines.

496

497

498 *Ancestral State Reconstruction*

499

500       The equal rates (ER) model was selected as the one that best fit our data given  
501 the AIC weights (Table 4). The results of the ancestral state reconstructions of color  
502 pattern show that few clades were restricted to a single color pattern. The root of the  
503 tree was reconstructed as the spotted color pattern. The “*erichsoni*” and “*congestus*”  
504 clades, approximately one half of the taxa, were predominantly reconstructed as  
505 spotted. The changes from a spotted pattern to another state occurred along the  
506 terminal branches in this clade (Fig. 5). The other half of the taxa showed changes at  
507 deeper nodes, and their probabilities were not overwhelming given to one character  
508 state. One of the most striking observations from the reconstruction was that patterns,  
509 such as the net-like/Moroccan-tile pattern of *P. reticulatus*, occur independently in  
510 several different places in the tree. The unique rainbow color pattern (blues and  
511 yellows) also occurred in multiple clades (Figs. 2, 5).

512       For the analyses using the polymorphic Mk model framework, the “*transient*”  
513 model of transitions between different character states was selected as having the best  
514 fit to the data given the AIC weights. Here, the predominant pattern as well as the root  
515 node were reconstructed as having the filled bands character state (Fig. 5). There were  
516 six separate transitions from the filled state to the filled+open bands character state, two  
517 of these occurring along terminal branches. Polymorphic species occur in all major  
518 clades (Figs. 1–2, 5), except in the “*orbifer*” and “*gloriosus*” clades (Figs. 1, 5). In the  
519 “*orbifer*” clade, there was a transition from the polymorphic state to the open state at the  
520 node leading to *P. cruciatus*.

521

| Mk model | df  | AIC     | AIC_wt |
|----------|-----|---------|--------|
| SYM      | 55  | 322.052 | 0      |
| ER       | 1   | 249.767 | 1      |
| ARD      | 110 | 410.323 | 0      |

  

| Poly.Mk model | df | AIC    | AIC_wt |
|---------------|----|--------|--------|
| SYM           | 2  | 95.562 | 0.217  |
| ER            | 1  | 99.936 | 0.024  |
| ARD           | 4  | 96.457 | 0.139  |
| Transient     | 2  | 93.460 | 0.620  |

522

523 **Table 4. Color pattern model selection results.**

524

525

526

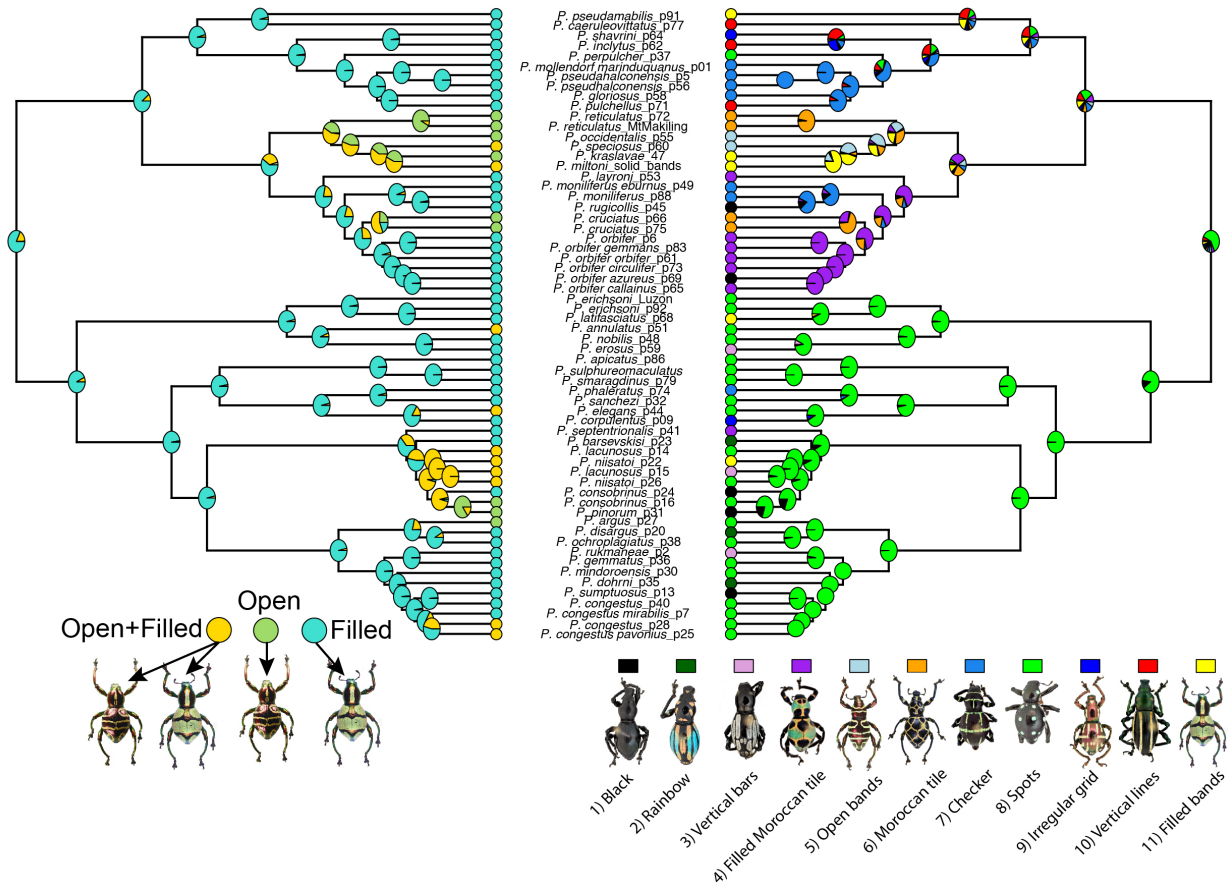

527  
528  
529  
530  
531  
532  
533  
534  
535  
536  
537  
538

**Figure 5. Ancestral state reconstruction of color patterns.** Left, ancestral state reconstruction of polymorphic species states using *phytools* “*fitpolyMK*” function with the “*transient*” model. The character states were coded as “Open”, “Filled”, and “Open+Filled” where both states occur in a species. The polymorphic state can be associated with different color pattern states depending on the species (see lower right), for example “filled or open spots”, but never two different patterns within the same species e.g. “filled bands and open spots”. Right, ancestral state reconstruction using the “*fitMK*” function using the “*ER*” equal rates model. The 11 major color patterns observed in *Pachyrhynchus* are denoted in the lower right, colors correspond to those in the tree.

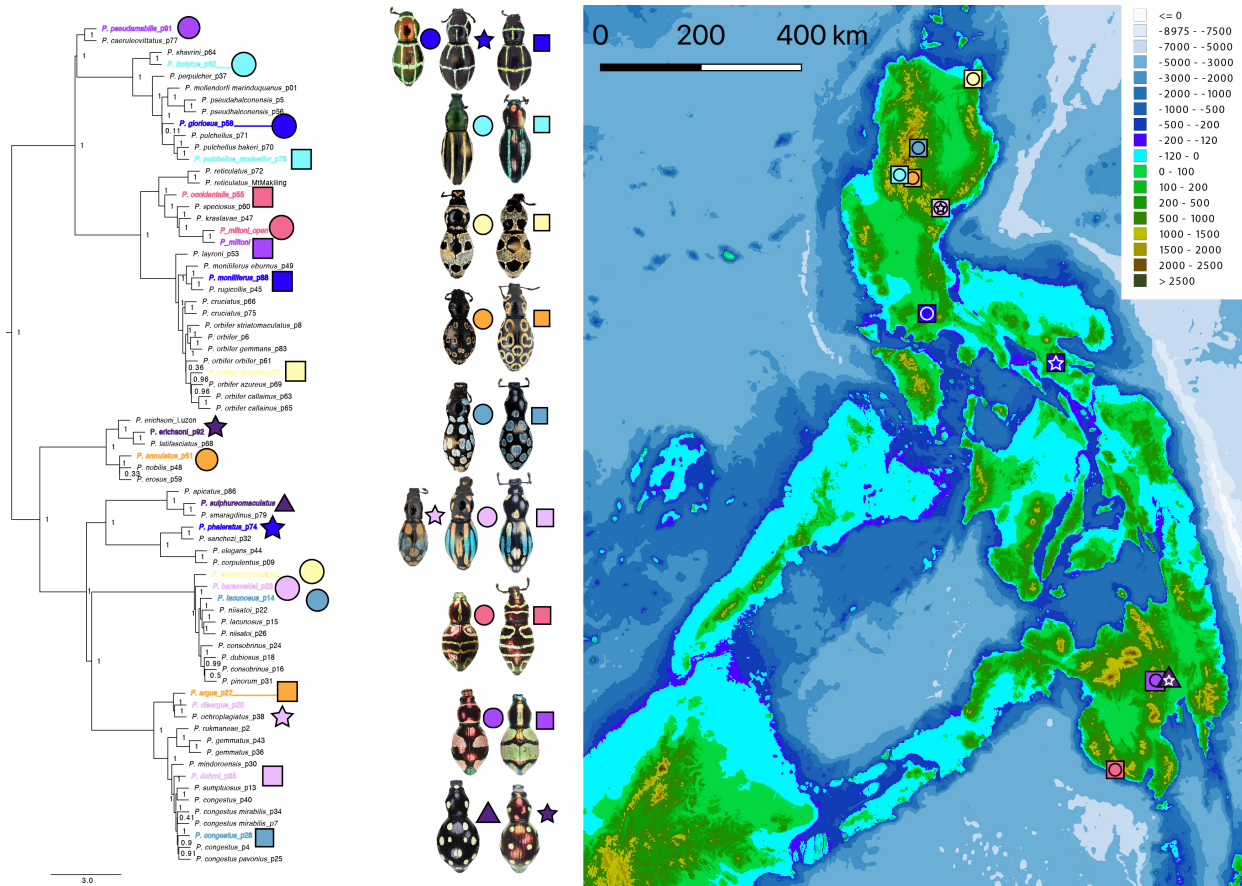

539  
 540 **Figure 6. ASTRAL species tree of *Pachyrhynchus* with sympatric mimetic species.** Colored symbols  
 541 on phylogeny correspond to those in the central column and map. Node labels correspond to the LPP.  
 542 **Central column**, mimetic species of *Pachyrhynchus*. **Right**, map of the Philippines, turquoise blue color  
 543 denotes the -120m isobath, indicating land connection during Pleistocene glacial cycles.

544

545

## 546 DISCUSSION

547

548 We present the first phylogeny of the genus *Pachyrhynchus* based on 71 pinned  
 549 and 16 ethanol preserved specimens using 10,108 UCE loci. Our results from both the  
 550 concatenated and species tree analyses are highly supported with largely concordant  
 551 topologies, demonstrating the benefit of Next Generation Sequencing and the value of  
 552 historical museum specimens. With the phylogeny, biogeographic analysis, and  
 553 ancestral state reconstructions of color patterns, we addressed how the wide array of

554 phenotypes originated and broad scale evolutionary trends in this Müllerian mimicry  
555 system.

556

557 Müllerian Mimicry in *Pachyrhynchus*

558

559 For this study, we functionally define Müllerian mimetic groups as two or more  
560 species of armored<sup>23,24</sup> *Pachyrhynchus* weevils that share similar color patterns and are  
561 sympatric but do not share a most recent common ancestor. From our dataset, we  
562 identified 11 color patterns and at least nine distinctive mimetic groups in this system  
563 (Fig. 6). Members of each mimetic group closely resemble each other in their elytral  
564 patterns, and they also occur in sympatry, presumably sharing the same populations of  
565 predators (birds, lizards and frogs<sup>23,25</sup>). We found that most similar color patterns arose  
566 independently in distantly related taxa (Fig. 6), with a divergence time up to 20 MY  
567 between these taxa. For example, although *P. moniliferus* and *P. phaleratus* look  
568 superficially similar, they are not each other's closest relatives, and are in fact at other  
569 ends of the tree (Fig. 6, top row, circle and square). As well, some color patterns do  
570 share common origins. For example, the *P. absurdus* species group and *P. speciosus*  
571 species group, co-occur throughout the greater Mindanao PAIC (Fig. 6, sixth row). This  
572 indicates that Müllerian mimetic evolution in *Pachyrhynchus* is mostly driven by  
573 convergence in conjunction with rare examples of shared ancestry. The mixed evolution  
574 of patterns has also been observed in *Heliconius* butterflies<sup>12,86</sup>.

575 While some members of the mimetic groups strongly resemble each other,  
576 others have only minor differences in pattern and/or color that are detectable by human

577 eyes. Recent studies suggest that Müllerian mimicry might not be as clear-cut as  
578 originally proposed, and imperfect mimics and polymorphisms exist and may be  
579 common in nature<sup>14,87–90</sup>. These studies suggest that varied forms of mimics are able to  
580 persist due to limited cognitive capabilities of predators<sup>91–93</sup> and/or predator avoidance  
581 of imperfect mimics due to the high cost of error<sup>89,92,94</sup>. Imperfect Müllerian mimicry  
582 adds additional complexity to the diversification process and phenotypic variation in  
583 *Pachyrhynchus*. For example, sympatric species in southern Mindanao, such as *P.*  
584 *erichsoni*, *P. miltoni*, and *P. pseudamabilis* all have a metallic red coloration to their  
585 cuticle, but differ in their maculations, spots or filled bands. (Fig. 6, bottom two rows).

586

#### 587 Biogeography of the Pleistocene Aggregate Island Complex (PAIC)

588

589 We find that all of the deeper lineages of the genus originated well before the  
590 PAIC was formed (Fig. 4). Additionally, within the major clades (Figs. 1–2), we find that  
591 most of their diversification events occurred during the Pliocene with some at the  
592 beginning of the Pleistocene (Fig. 4). This is significant because late Pliocene and early  
593 Pleistocene periods consisted of glacial/interglacial cycles<sup>95–97</sup>. These interglacial time  
594 periods should have promoted isolation between populations of *Pachyrhynchus*.  
595 Another period of higher sea level is the mid-Pliocene when it was 2–3°C hotter than  
596 today<sup>98</sup>, the interglacial periods would have caused significant isolation and perhaps  
597 promoted separate insular color morphs that would not have been compatible with  
598 neighboring larger PAIC islands when they were connected during lower sea levels. We  
599 see highly different color patterns today on such islands as Marinduque once connected

600 to Luzon during the Pleistocene. The colonization history of such nearshore islands also  
601 contributes to differences from the larger PAIC islands. The divergence date for many  
602 species largely coincides with the mid-Pliocene time period, and as many  
603 *Pachyrhynchus* species are confined to higher elevations this may have influenced  
604 divergence on the larger PAIC islands (e.g., Luzon and Mindanao) as well. However, as  
605 there is a wide 95 HPD around these divergence times, we cannot entirely rule out early  
606 Pleistocene cycles as well. One striking pattern about the biogeography of  
607 *Pachyrhynchus* is that there is no back colonization of Luzon given its relative proximity  
608 and size to other major PAIC island groups. One factor that may have promoted this is  
609 that species colonizing an already inhabited landscape with other *Pachyrhynchus*  
610 species would not have had color patterns that matched the local fauna. However, this  
611 also could be a random effect, or an artifact of our sampling. Lastly, more precise  
612 geological data for when different islands emerged above sea level would greatly  
613 benefit Philippine biogeography.

614

#### 615 *Insight into Pachyrhynchus Phylogeny and the Evolution of Color Patterns*

616

617 Our phylogeny suggests that solely focusing on external morphology and color  
618 pattern may have driven inaccurate conclusions in previous taxonomic literature. For  
619 instance, *P. reticulatus* and *P. cruciatus* species share the superficial similarity of color  
620 pattern, while our phylogeny shows, with strong support, that they are distantly related,  
621 indicating convergence in color patterns. Although outside of the scope of this paper,  
622 our phylogeny could provide a great resource for taxonomic revision and species  
623 delimitation.



624 In addition to convergence, discrete polymorphism of patterns occurs frequently  
625 in populations and can complicate species identification if descriptions are based solely  
626 on morphology. Our phylogenetic results indicate that individuals with varied patterns  
627 should not be treated as separate species. For example, *P. miltoni* individuals may look  
628 different based on color pattern but are nearly identical genetically. We suggest that  
629 genetic data should be considered into future taxonomy and systematics of  
630 Pachyrhynchini beetles that have such complex mimetic evolution and biogeographic  
631 history. By integrating phylogenetic information to the taxonomy and systematics, the  
632 risk of creating synonyms or erroneous taxa will be diminished.

633 The type of binary polyphenism mentioned above is unusual in mimetic systems,  
634 with few examples in Coleoptera. One similar example occurs in the *Harmonia* ladybird  
635 beetles, but unlike *Pachyrhynchus*, the patterning is more of a continuum<sup>99</sup>. Additionally,  
636 in the ladybird beetle system, the color patterns are derived from pigments, and in  
637 *Pachyrhynchus* they are structural colors<sup>27</sup>. In Lepidoptera, discrete color polymorphism  
638 is more widespread and is known to occur in *Arctia plantaginis* tiger moths<sup>100</sup>, between  
639 the sexes of *Neophasia terlooii* butterflies, males are white and females are orange<sup>101</sup>,  
640 as well as in *Heliconius*<sup>12</sup>.

641 We suggest that selection of color patterns is frequency-dependent. This  
642 hypothesis is supported by casual observations of *Pachyrhynchus* specimens in the  
643 CASENT collection, we counted the relative abundances of beetles with particular  
644 patterns in some well-studied localities. For instance, *P. moniliferus* is a widespread,  
645 relatively common species found in southern Luzon. It co-occurs with several other  
646 species with more restricted ranges. For example, in Iriga, Camarines, Luzon, 69 *P.*

647 *moniliferus* specimens (CASENT) were collected, but only three of the larger *P.*  
648 *phaleratus* (Fig. 6 top row, star and square) were collected at the same location and  
649 time period (May–Oct. 1931). In addition, at Mt. Makiling, Luzon, (May–Dec. 1930–31),  
650 38 specimens of *P. gloriosus* were collected compared to 225 *P. moniliferus* (Fig. 6 top  
651 row, circle and square). Because all *Pachyrhynchus* species have a hard cuticle (often  
652 bending pins during preparation)<sup>23</sup>, but have many different color patterns, frequency  
653 dependent selection is likely acting on the color pattern and not cuticular hardness. In  
654 the case of polymorphic species, frequency dependent selection may also be a cause of  
655 the observed frequencies. For example, in *P. miltoni*, found in the southern Davao City  
656 Province of Mindanao, the ratio of the filled band morphs to the open band morphs is  
657 35:2, but in neighboring populations near Mt. Apo, the open-banded morph is most  
658 abundant (CRC and CASENT collections). Although more methodical studies should be  
659 done to control for artifacts caused by uneven sampling, different years of collection,  
660 seasonality, etc.; including information about polymorphism helps to elucidate how  
661 particular patterns evolved. For instance, *P. reticulatus* species with open bands were  
662 descended from polymorphic populations of *P. reticulatus* inferred from our ancestral  
663 state reconstructions (Fig. 6). Because these beetles are flightless with patchy  
664 distributions, (some only restricted to a single mountain), the relative frequencies of  
665 these color morphs are likely to be fixed in isolated populations and is a possible cause  
666 for speciation. This could perhaps explain why we find convergent color patterns  
667 between allopatric species that are not each other's closest relatives.

668

669 UCE Partitioning

670

671           We have demonstrated that the universal use of a single model of nucleotide  
672 substitution is inadequate to accommodate site rate heterogeneity across UCE sets.  
673 The preferred use of multiple modes within a UCE locus has also been observed when  
674 constructing gene trees with MrBayes<sup>62</sup>. Additionally, we found that using more than  
675 three partitions was selected as optimal. While UCE loci have been treated as varying  
676 symmetrically around the central core<sup>62,63,102</sup>, we find that often this is not the case as a  
677 variable, even number of partitions was selected. This suggests that flanking regions  
678 tend to be highly variable and that treating them as symmetrical units is a suboptimal  
679 partitioning design. More analyses are required to compare the design of Tagliacollo  
680 and Lanfear 2018<sup>63</sup> to the design we propose here to make a decisive decision of which  
681 scheme is optimal for UCE partitioning. The partition method we employ is the only one  
682 that accommodates the combination of neighboring or co-genic UCEs<sup>51</sup> (the method of  
683 Tagliacollo and Lanfear 2018<sup>63</sup> could be easily updated). The asymmetry in variation  
684 away from the UCE core is perhaps due to the way in which UCE loci are treated in the  
685 alignment process, mainly that difficult to align regions are trimmed in a less symmetric  
686 manner around the core of the locus.

687

### 688 Future Directions

689           Several unique features add intriguing complexity to our study system and, thus,  
690 inspire further studies. Color patterns in *Pachyrhynchus* are formed by the arrangement  
691 of scales, and the different scales' colors result from light reflectance on photonic  
692 crystals coupled with the background color of the elytra. The colors are structural<sup>27</sup>,

693 differing from the pigment-based colors of most other Coleoptera<sup>14</sup> or *Heliconius*  
694 butterflies. This indicates a different genetic pathway that underlies their evolution and  
695 diversification. Our phylogeny provides a robust basis for further research to uncover  
696 the genetic mechanism controlling structural coloration in an evolutionary framework.

697         The armored exoskeleton is essential for a weevil's survival. Thick cuticle  
698 formation relies on the generation of its precursor amino acid, tyrosine, produced by  
699 obligate bacterial endosymbionts of the *Nardonella* lineage<sup>26</sup>. *Nardonella* has a much-  
700 reduced genome of 0.2 Mb and lacks genes responsible for most metabolic pathways;  
701 they rely on the beetle's metabolic output for survival<sup>26</sup>. Interestingly, *Pachyrhynchus*'  
702 elytra and cuticle are initially soft and easily deformed when they are teneral (soft  
703 bodied) adults, but the color patterns are apparent as soon as weevils emerge from the  
704 pupae<sup>26</sup> (personal obs. A Cabras). Their bold patterning likely provides protection from  
705 predators that have learned to avoid the aposematic signal in older adults. Predator  
706 avoidance during vulnerable stages is likely essential for survival until reproduction.  
707 More ecological studies on population densities of sympatric *Pachyrhynchus* species  
708 and predator preferences can also help to elucidate color pattern evolution on a  
709 landscape scale.

710         In summation, we clearly demonstrated that many of the mimetic color patterns  
711 observed in sympatry are due to convergent evolution and not simply due to  
712 inheritance. Based on our observations in natural history collections, we hypothesize  
713 that convergence between these independent color pattern forms is likely driven by  
714 frequency dependent selection. Lastly, the use of a UCE design specific to the tribe  
715 Pachyrhynchini was highly successful in resolving the relationships between our taxon.

716 Our study presents an interesting system of Müllerian mimicry and provides a  
717 framework for an integrative approach to study other similar systems.

718

## 719 **Acknowledgments**

720 This research was funded in part by a generous gift from to the C.A.S. from Will and  
721 Margaret Hearst for supporting the 2011 Filipino-American Hearst Biodiversity  
722 expedition to Luzon. We were also funded in part through NSF:DEB award number  
723 1856402 made to MHVD. We would like to thank the Ruth Tawan-tawan, Ceso II of the  
724 Philippines' Department of Environment and Natural Resources Region XI for help with  
725 the Gratuitous and export permits. We would also like to thank the University of  
726 Mindanao for the mobility support, and Milton N. Medina and Chrestine Torrejos of U.M.  
727 for help collecting specimens. We would also like to thank Sarah Crews and Alejandra  
728 Hernandez-Agreda of C.A.S. for help with the manuscript text. We would like to thank  
729 Jim Henderson C.A.S. for help with the 10X assembly.

730

## 731 **References**

- 732 1. Jiggins, C. D. & McMillan, W. O. The genetic basis of an adaptive radiation:  
733 Warning colour in two *Heliconius* species. *Proc. R. Soc. B Biol. Sci.* **264**, 1167–  
734 1175 (1997).
- 735 2. Brower, A. V. Z. Parallel race formation and the evolution of mimicry in *Heliconius*  
736 butterflies: A phylogenetic hypothesis from mitochondrial DNA sequences.  
737 *Evolution (N. Y.)*. **50**, 195–221 (1996).
- 738 3. Mallet, J. & Gilbert, L. E. Why are there so many mimicry rings? Correlations  
739 between habitat, behaviour and mimicry in *Heliconius* butterflies. *Biol. J. Linn.*  
740 *Soc.* **55**, 159–180 (1995).
- 741 4. Beccaloni, G. W. Vertical stratification of ithomiine butterfly (Nymphalidae:  
742 Ithomiinae) mimicry complexes: the relationship between adult flight height and  
743 larval host-plant height. *Biol. J. Linn. Soc.* **62**, 313–341 (1997).
- 744 5. Kronforst, M. R. & Gilbert, L. E. The population genetics of mimetic diversity in  
745 *Heliconius* butterflies. *Proc. R. Soc. B Biol. Sci.* **275**, 493–500 (2008).
- 746 6. Dettner, K. & Liepert, C. Chemical Mimicry and Camouflage. *Annu. Rev. Entomol.*  
747 **39**, 129–154 (1994).

- 748 7. Muller, F. Ituna and Thyridia: a remarkable case of mimicry in butterflies. *R. Ent.*  
749 *Soc. London Trans* 12–29 (1879).
- 750 8. Mallet, J. & Joron, M. Evolution of Diversity in Warning Color and Mimicry:  
751 Polymorphisms, Shifting Balance, and Speciation. *Annu. Rev. Ecol. Syst.* **30**,  
752 201–233 (1999).
- 753 9. Sherratt, T. N. The evolution of Müllerian mimicry. *Naturwissenschaften* **95**, 681–  
754 695 (2008).
- 755 10. Chouteau, M., Arias, M. & Joron, M. Warning signals are under positive  
756 frequencydependent selection in nature. *Proc. Natl. Acad. Sci. U. S. A.* **113**,  
757 2164–2169 (2016).
- 758 11. Brower, A. V. Z. Rapid morphological radiation and convergence among races of  
759 the butterfly *Heliconius erato* inferred from patterns of mitochondrial DNA  
760 evolution. *Proc. Natl. Acad. Sci. U. S. A.* **91**, 6491–6495 (1994).
- 761 12. Kapan, D. D. Three-butterfly system provides a field test of müllerian mimicry.  
762 *Nature* **409**, 338–340 (2001).
- 763 13. Ritland, D. B. & Brower, L. P. The viceroy butterfly is not a batesian mimic. *Nature*  
764 **350**, 497–498 (1991).
- 765 14. Motyka, M., Kampova, L. & Bocak, L. Phylogeny and evolution of Müllerian  
766 mimicry in aposematic Dilophotes: Evidence for advergence and size-constraints  
767 in evolution of mimetic sexual dimorphism. *Sci. Rep.* **8**, (2018).
- 768 15. Wilson, J. S., Williams, K. A., Forister, M. L., Von Dohlen, C. D. & Pitts, J. P.  
769 Repeated evolution in overlapping mimicry rings among North American velvet  
770 ants. *Nat. Commun.* **3**, 1–7 (2012).
- 771 16. Lev-Yadun, S. Müllerian mimicry in aposematic spiny plants. *Plant Signal. Behav.*  
772 **4**, 482–483 (2009).
- 773 17. Symula, R., Schulte, R. & Summers, K. Molecular phylogenetic evidence for a  
774 mimetic radiation in Peruvian poison frogs supports a Müllerian mimicry  
775 hypothesis. *Proc. R. Soc. B Biol. Sci.* **268**, 2415–2421 (2001).
- 776 18. Chiari, Y. *et al.* New evidence for parallel evolution of colour patterns in Malagasy  
777 poison frogs (*Mantella*). *Mol. Ecol.* **13**, 3763–3774 (2004).
- 778 19. Sanders, K. L., Malhotra, A. & Thorpe, R. S. Evidence for a Müllerian mimetic  
779 radiation in Asian pitvipers. *Proc. R. Soc. B Biol. Sci.* **273**, 1135–1141 (2006).
- 780 20. Moore, T. Y., Danforth, S. M., Larson, J. G. & Davis Rabosky, A. R. A Quantitative  
781 Analysis of *Micrurus* Coral Snakes Reveals Unexpected Variation in Stereotyped  
782 Anti-Predator Displays Within a Mimicry System. *Integr. Org. Biol.* **2**, (2020).
- 783 21. JE Randall. A review of mimicry in marine fishes. *Zool. Stud.* **44**, 299–328 (2005).
- 784 22. Dumbacher, J. P. & Fleischer, R. C. Phylogenetic evidence for colour pattern  
785 convergence in toxic pitohuis: Müllerian mimicry in birds? *Proc. R. Soc. B Biol.*  
786 *Sci.* **268**, 1971–1976 (2001).
- 787 23. Tseng, H.-Y., Lin, C.-P., Hsu, J.-Y., Pike, D. A. & Huang, W.-S. The Functional  
788 Significance of Aposematic Signals: Geographic Variation in the Responses of  
789 Widespread Lizard Predators to Colourful Invertebrate Prey. *PLoS One* **9**, e91777  
790 (2014).
- 791 24. Wang, L. Y., Rajabi, H., Ghoroubi, N., Lin, C. P. & Gorb, S. N. Biomechanical  
792 strategies underlying the robust body armour of an aposematic weevil. *Front.*  
793 *Physiol.* **9**, 1410 (2018).

- 794 25. Schultze, W. A monograph of the pachyrrhynchid group of the Brachyderinae,  
795 Curculionidae: Part I. The genus *Pachyrrhynchus* Germar. *Philipp. J. Sci.* **23**,  
796 609–673 (1923).
- 797 26. Anbutsu, H. *et al.* Small genome symbiont underlies cuticle hardness in beetles.  
798 *Proc. Natl. Acad. Sci. U. S. A.* **114**, E8382–E8391 (2017).
- 799 27. Wilts, B. D. & Saranathan, V. A Literal Elytral Rainbow: Tunable Structural Colors  
800 Using Single Diamond Biophotonic Crystals in *Pachyrrhynchus congestus*  
801 Weevils. *Small* **14**, 1802328 (2018).
- 802 28. Wallace, A. *Darwinism: an exposition of the theory of natural selection with some*  
803 *of its applications.* (Macmillan and Company, 1889).
- 804 29. Schultze, W. A monograph of the pachyrrhynchid group of the Brachyderinae,  
805 Curculionidae: Part III. The genera *Apocyrtydus* Heller and *Metapocyrtydus* Heller.  
806 *Philipp. J. Sci.* **26**, 131–310 (1925).
- 807 30. Hsu, C.-F., Tseng, H.-Y., Hsiao, Y. & Ko, C.-C. First record of the host plant and  
808 larvae of *Pachyrrhynchus sonani* (Coleoptera: Curculionidae) on Lanyu Island,  
809 Taiwan. *Entomol. Sci.* **20**, 288–291 (2017).
- 810 31. Yoshitake, H. A New Genus and Two New Species of the Tribe Pachyrrhynchini  
811 (Coleoptera: Curculionidae) from Palawan Island, the Philippines. *Elytra* **8**, 4–15  
812 (2018).
- 813 32. Rukmane A. An annotated checklist of genus *Pachyrrhynchus* (Coleoptera:  
814 Curculionidae: Pachyrrhynchini). in **18 (1):63-68**, (Acta Biol. Univ. Daugavp, 2018).
- 815 33. Chen, Y.-T. *et al.* Integrated species delimitation and conservation implications of  
816 an endangered weevil *Pachyrrhynchus sonani* (Coleoptera: Curculionidae) in  
817 Green and Orchid Islands of Taiwan. *Syst. Entomol.* **42**, 796–813 (2017).
- 818 34. Bollino, M., Sandel, F. & Rukmane, A. New species of the genus *Pachyrrhynchus*  
819 Germar, 1824 (Coleoptera: Curculionidae) from Mindanao, Philippines. *Balt. J.*  
820 *Coleopterol.* **17**, 189–204 (2017).
- 821 35. Rukmane-Bārbale, A. Short contribution to distribution and appearance of  
822 *Pachyrrhynchus decussatus* Waterhouse, 1841 (Entimine: Pachyrrhynchini) with  
823 description of one new taxon from Catanduanes Island, Philippines. *Balt. J.*  
824 *Coleopterol.* **20**, 81–85 (2020).
- 825 36. Heller, K. . New Philippine Zygopinae, Calandrinae, and Cryptoderminae  
826 (Curculionidae, Coleoptera). *Philipp. J. Sci.* **25**, 287–309 (1924).
- 827 37. Heaney, L. Zoogeographic evidence for middle and late Pleistocene land bridges  
828 to the Philippine Islands. *Mod Quatern Res SE Asia* **9**, 127–144 (1985).
- 829 38. Heaney, L. R. Biogeography of mammals in SE Asia: estimates of rates of  
830 colonization, extinction and speciation. *Biol. J. Linn. Soc.* **28**, 127–165 (1986).
- 831 39. Heaney, L. R. & Regalado, J. C. . J. Vanishing treasures of the Philippine rain  
832 forest. *Vanish. treasures Philipp. rain For.* (1998).
- 833 40. Brown, R. & AC Diesmos. Application of lineage-based species concepts to  
834 oceanic island frog populations: the effects of differing taxonomic philosophies on  
835 the estimation of Philippine biodiversity. *Silliman J.* **41**, 133–162 (2002).
- 836 41. Sinha, C. & Heaney, L. R. *Philippine Biodiversity: Principles and Practice.* (2006).
- 837 42. Steppan, S. J., Zawadzki, C. & Heaney, L. R. Molecular phylogeny of the endemic  
838 Philippine rodent *Apomys* (Muridae) and the dynamics of diversification in an  
839 oceanic archipelago. *Biol. J. Linn. Soc.* **80**, 699–715 (2003).

- 840 43. Inger. Systematics and zoogeography of Philippine Amphibia. *Fieldiana* **33**, 182–  
841 531 (1954).
- 842 44. Brown, R. M. & Siler, C. D. Spotted stream frog diversification at the Australasian  
843 faunal zone interface, mainland versus island comparisons, and a test of the  
844 Philippine ‘dual-umbilicus’ hypothesis. *J. Biogeogr.* **41**, 182–195 (2014).
- 845 45. Belton, J. M. *et al.* Hi-C: A comprehensive technique to capture the conformation  
846 of genomes. *Methods* **58**, 268–276 (2012).
- 847 46. Chen, S., Zhou, Y., Chen, Y. & Gu, J. Fastp: An ultra-fast all-in-one FASTQ  
848 preprocessor. in *Bioinformatics* **34**, i884–i890 (Oxford University Press, 2018).
- 849 47. Bankevich, A. *et al.* SPAdes: A new genome assembly algorithm and its  
850 applications to single-cell sequencing. *J. Comput. Biol.* **19**, 455–477 (2012).
- 851 48. Weisenfeld, N. I., Kumar, V., Shah, P., Church, D. M. & Jaffe, D. B. Direct  
852 determination of diploid genome sequences. *Genome Res.* **27**, 757–767 (2017).
- 853 49. Faircloth, B. C. *et al.* Ultraconserved elements anchor thousands of genetic  
854 markers spanning multiple evolutionary timescales. *Syst. Biol.* **61**, 717–726  
855 (2012).
- 856 50. Faircloth, B. C. Identifying conserved genomic elements and designing universal  
857 bait sets to enrich them. *Methods Ecol. Evol.* **8**, 1103–1112 (2017).
- 858 51. Van Dam, M. H. *et al.* The Easter Egg Weevil (*Pachyrhynchus*) genome reveals  
859 synteny in Coleoptera across 200 million years of evolution. *bioRxiv*  
860 2020.12.18.422986 (2020). doi:10.1101/2020.12.18.422986
- 861 52. Gustafson, G. T. *et al.* Ultraconserved element (UCE) probe set design: Base  
862 genome and initial design parameters critical for optimization. *Ecol. Evol.* **9**, 6933–  
863 6948 (2019).
- 864 53. Toussaint, E. F. A., Tänzler, R., Rahmadi, C., Balke, M. & Riedel, A.  
865 Biogeography of Australasian flightless weevils (*Curculionidae*, *Ceulethetini*)  
866 suggests permeability of Lydekker’s and Wallace’s Lines. *Zool. Scr.* **44**, 632–644  
867 (2015).
- 868 54. Katoh, K., Misawa, K., Kuma, K. I. & Miyata, T. MAFFT: A novel method for rapid  
869 multiple sequence alignment based on fast Fourier transform. *Nucleic Acids Res.*  
870 **30**, 3059–3066 (2002).
- 871 55. Capella-Gutierrez, S., Silla-Martinez, J. M. & Gabaldon, T. trimAl: a tool for  
872 automated alignment trimming in large-scale phylogenetic analyses.  
873 *Bioinformatics* **25**, 1972–1973 (2009).
- 874 56. Kozlov, A. M., Darriba, D., Flouri, T., Morel, B. & Stamatakis, A. RAXML-NG: a  
875 fast, scalable and user-friendly tool for maximum likelihood phylogenetic  
876 inference. *Bioinformatics* **35**, 4453–4455 (2019).
- 877 57. Yin, J., Zhang, C. & Mirarab, S. ASTRAL-MP: scaling ASTRAL to very large  
878 datasets using randomization and parallelization. *Bioinformatics* **35**, 3961–3969  
879 (2019).
- 880 58. Zhang, C., Rabiee, M., Sayyari, E. & Mirarab, S. ASTRAL-III: Polynomial time  
881 species tree reconstruction from partially resolved gene trees. *BMC*  
882 *Bioinformatics* **19**, 153 (2018).
- 883 59. Edelman, N. B. *et al.* Genomic architecture and introgression shape a butterfly  
884 radiation. *Science (80-. )*. **366**, 594–599 (2019).
- 885 60. Lawrence, M. *et al.* Software for Computing and Annotating Genomic Ranges.



- 886 *PLoS Comput. Biol.* **9**, e1003118 (2013).
- 887 61. Heibl, C. PHYLOCH: R language tree plotting tools and interfaces to diverse  
888 phylogenetic software packages. (2008). Available at:  
889 <http://www.christophheibl.de/Rpackages.html>. (Accessed: 17th January 2021)
- 890 62. Van Dam, M. H. *et al.* Ultraconserved elements (UCEs) resolve the phylogeny of  
891 Australasian smurf-weevils. *PLoS One* **12**, e0188044 (2017).
- 892 63. Tagliacollo, V. A. & Lanfear, R. Estimating improved partitioning schemes for  
893 ultraconserved elements. *Mol. Biol. Evol.* **35**, 1798–1811 (2018).
- 894 64. Van Dam, M. H., Trautwein, M., Spicer, G. S. & Esposito, L. Advancing mite  
895 phylogenomics: Designing ultraconserved elements for Acari phylogeny. *Mol.*  
896 *Ecol. Resour.* **19**, 465–475 (2019).
- 897 65. Lanfear, R., Frandsen, P. B., Wright, A. M., Senfeld, T. & Calcott, B.  
898 Partitionfinder 2: New methods for selecting partitioned models of evolution for  
899 molecular and morphological phylogenetic analyses. *Mol. Biol. Evol.* **34**, 772–773  
900 (2017).
- 901 66. Junier, T. & Zdobnov, E. M. The Newick utilities: high-throughput phylogenetic  
902 tree processing in the UNIX shell. *Bioinformatics* **26**, 1669–1670 (2010).
- 903 67. Zhang, C., Rabiee, M., Sayyari, E. & Mirarab, S. ASTRAL-III: Polynomial time  
904 species tree reconstruction from partially resolved gene trees. *BMC*  
905 *Bioinformatics* **19**, 153 (2018).
- 906 68. Mirarab, S. Species Tree Estimation Using ASTRAL: Practical Considerations.  
907 *arXiv* (2019).
- 908 69. Sayyari, E. & Mirarab, S. Fast Coalescent-Based Computation of Local Branch  
909 Support from Quartet Frequencies. *Mol. Biol. Evol.* **33**, 1654–1668 (2016).
- 910 70. Yang, Z. PAML 4: Phylogenetic Analysis by Maximum Likelihood. *Mol. Biol. Evol.*  
911 **24**, 1586–1591 (2007).
- 912 71. Puttick, M. N. MCMCtreeR: functions to prepare MCMCtree analyses and  
913 visualize posterior ages on trees. *Bioinformatics* **35**, 5321–5322 (2019).
- 914 72. Dos Reis, M. & Yang, Z. The unbearable uncertainty of Bayesian divergence time  
915 estimation. *J. Syst. Evol.* **51**, 30–43 (2013).
- 916 73. Zhu, T., Reis, M. Dos & Yang, Z. Characterization of the uncertainty of divergence  
917 time estimation under relaxed molecular clock models using multiple loci. *Syst.*  
918 *Biol.* **64**, 267–280 (2015).
- 919 74. Reis, M. Dos & Yang, Z. Approximate likelihood calculation on a phylogeny for  
920 Bayesian Estimation of Divergence Times. *Mol. Biol. Evol.* **28**, 2161–2172 (2011).
- 921 75. Matzke, N. J. Model Selection in Historical Biogeography Reveals that Founder-  
922 Event Speciation Is a Crucial Process in Island Clades. *Syst. Biol.* **63**, 951–970  
923 (2014).
- 924 76. Tangunan, Fernando & Arcilla, C. Notes on the occurrence of Late Cretaceous  
925 nannofossils from Codon Point, San Andres, Catanduanes. *J. Geol. Soc. Philipp.*  
926 **64**, 35–47 (2013).
- 927 77. Vallejo, B. The Biogeography of Luzon Island Biogeography of Luzon Island ,  
928 Philippines. **2**, (2014).
- 929 78. Knittel, U. *et al.* Diverse protolith ages for the Mindoro and Romblon  
930 Metamorphics (Philippines): Evidence from single zircon U-Pb dating. *Isl. Arc* **26**,  
931 e12160 (2017).

- 932 79. Ree, R. H. & Smith, S. A. Maximum Likelihood Inference of Geographic Range  
933 Evolution by Dispersal, Local Extinction, and Cladogenesis. *Syst. Biol.* **57**, 4–14  
934 (2008).
- 935 80. Ronquist, F. Dispersal-Vicariance Analysis: A New Approach to the Quantification  
936 of Historical Biogeography. *Syst. Biol.* **46**, 195 (1997).
- 937 81. Landis, M. J., Matzke, N. J., Moore, B. R. & Huelsenbeck, J. P. Bayesian Analysis  
938 of Biogeography when the Number of Areas is Large. *Syst. Biol.* **62**, 789–804  
939 (2013).
- 940 82. Brown, R. M. *et al.* Phylogeny of the island archipelago frog genus *Sanguirana*:  
941 Another endemic Philippine radiation that diversified ‘Out-of-Palawan’. *Mol.*  
942 *Phylogenet. Evol.* **94**, 531–536 (2016).
- 943 83. Van Dam, M. H. & Matzke, N. J. Evaluating the influence of connectivity and  
944 distance on biogeographical patterns in the south-western deserts of North  
945 America. *J. Biogeogr.* **43**, 1514–1532 (2016).
- 946 84. Revell, L. J. *phytools*: an R package for phylogenetic comparative biology (and  
947 other things). *Methods Ecol. Evol.* **3**, 217–223 (2012).
- 948 85. Waterhouse, G. Descriptions of the Species of the Curculionideous Genus  
949 *Pachyrhynchus*, Sch., collected hi/ H. Cuming, Esq., in the Philippine Islands.  
950 *Trans. Entomol. Soc. London* **3**, 310–327 (1841).
- 951 86. Hines, H. M. *et al.* Wing patterning gene redefines the mimetic history of  
952 *Heliconius* butterflies. *Proc. Natl. Acad. Sci. U. S. A.* **108**, 19666–19671 (2011).
- 953 87. Sherratt, T. N. The evolution of imperfect mimicry. *Behav. Ecol.* **13**, 821–826  
954 (2002).
- 955 88. Penney, H. D., Hassall, C., Skevington, J. H., Abbott, K. R. & Sherratt, T. N. A  
956 comparative analysis of the evolution of imperfect mimicry. *Nature* **483**, 461–464  
957 (2012).
- 958 89. Kikuchi, D. W. & Pfennig, D. W. Imperfect mimicry and the limits of natural  
959 selection. *Q. Rev. Biol.* **88**, 297–315 (2013).
- 960 90. Brown, K. S. & Benson, W. W. Adaptive Polymorphism Associated with Multiple  
961 Mullerian Mimicry in *Heliconius numata* (Lepid. Nymph.). *Biotropica* **6**, 205 (1974).
- 962 91. Dittrich, W., Gilbert, F., Green, P., Mcgregor, P. & Grewcock, D. Imperfect  
963 mimicry: a pigeon’s perspective. *Proc. R. Soc. London. Ser. B Biol. Sci.* **251**, 195–  
964 200 (1993).
- 965 92. Edmunds, M. Why are there good and poor mimics? *Biol. J. Linn. Soc.* **70**, 459–  
966 466 (2000).
- 967 93. Richards-Zawacki, C. L., Yeager, J. & Bart, H. P. S. No evidence for differential  
968 survival or predation between sympatric color morphs of an aposematic poison  
969 frog. *Evol. Ecol.* **27**, 783–795 (2013).
- 970 94. Duncan, C. J. & Sheppard, P. M. Sensory Discrimination and Its Role in the  
971 Evolution of Batesian Mimicry. *Behaviour* **24**, 269–282 (1965).
- 972 95. Haq, B. U., Hardenbol, J. & Vail, P. R. Chronology of fluctuating sea levels since  
973 the Triassic. *Science (80- )*. **235**, 1156–1167 (1987).
- 974 96. Miller, K. G. *et al.* The phanerozoic record of global sea-level change. *Science*  
975 **310**, 1293–1298 (2005).
- 976 97. Oaks, J. R., Siler, C. D. & Brown, R. M. The comparative biogeography of  
977 Philippine geckos challenges predictions from a paradigm of climate-driven

978 vicariant diversification across an island archipelago. *Evolution (N. Y.)* **73**, 1151–  
979 1167 (2019).

980 98. Robinson, M. M., Dowsett, H. J. & Chandler, M. A. Pliocene Role in Assessing  
981 Future Climate Impacts. *Eos, Trans. Am. Geophys. Union* **89**, 501 (2008).

982 99. Gautier, M. *et al.* The Genomic Basis of Color Pattern Polymorphism in the  
983 Harlequin Ladybird. *Curr. Biol.* **28**, 3296-3302.e7 (2018).

984 100. Yen, E. C. *et al.* A haplotype-resolved, de novo genome assembly for the wood  
985 tiger moth (*Arctia plantaginis*) through trio binning. *Gigascience* **9**, 1–12 (2020).

986 101. Halbritter, D. A., Gordon, J. M., Keacher, K. L., Avery, M. L. & Daniels, J. C.  
987 Evaluating an alleged mimic of the monarch butterfly: *Neophasia* (Lepidoptera:  
988 Pieridae) butterflies are palatable to avian predators. *Insects* **9**, (2018).

989 102. Freitas, F. V, Branstetter, M. G., Griswold, T. & Almeida, E. A. B. Partitioned  
990 Gene-Tree Analyses and Gene-Based Topology Testing Help Resolve  
991 Incongruence in a Phylogenomic Study of Host-Specialist Bees (Apidae:  
992 Eucerinae). *Mol. Biol. Evol.* (2020). doi:10.1093/molbev/msaa277  
993  
994  
995  
996  
997  
998  
999  
1000  
1001  
1002  
1003  
1004  
1005  
1006  
1007  
1008  
1009  
1010  
1011  
1012  
1013  
1014  
1015  
1016  
1017  
1018  
1019

1020 **Supplemental Figures**

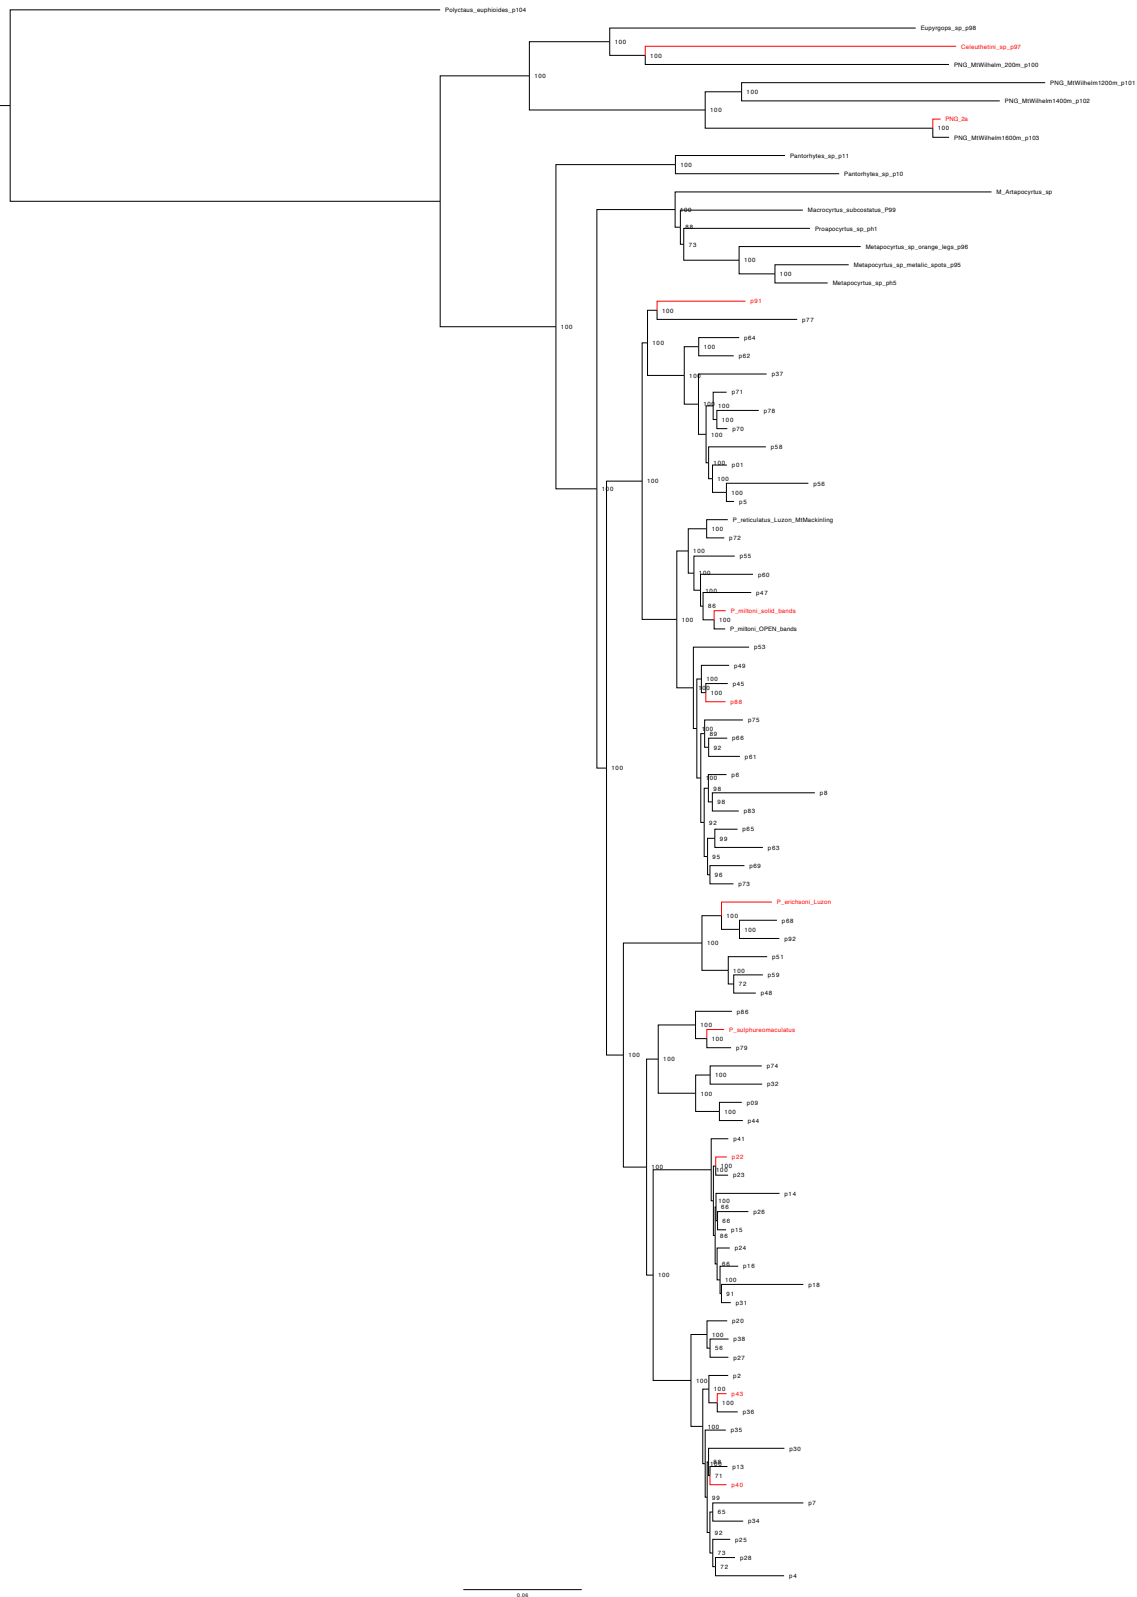

1021  
1022  
1023

**Supplementary Figure 1. *Pachyrhynchus* concatenated ML phylogeny constructed with RAxML-NG. Node labels are bootstrap support values. Branches in red are the taxa used in probe design.**

1024  
1025  
1026

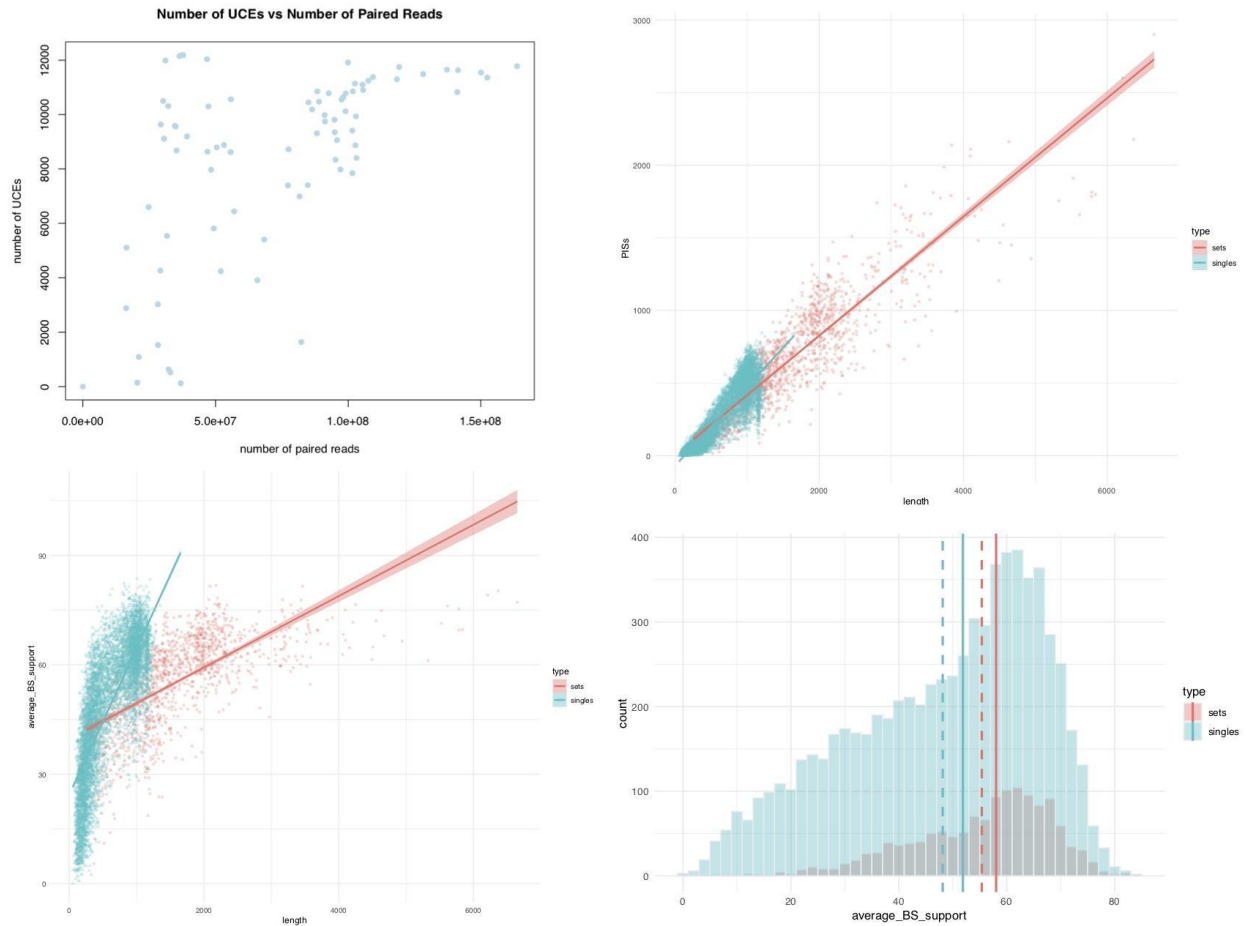

1027  
1028  
1029  
1030  
1031  
1032  
1033  
1034  
1035

**Supplementary Figure 2.** Upper left panel, Number of UCEs recovered vs number of paired reads. For the UCE type, the "sets" are concatenated UCEs found in a 25kb non-overlapping sliding window bin, and UCE "singles" are those where only a single UCE occupies a 25kb bin in the *P. sulphureomaculatus* base genome. **Upper right**, Phylogenetically informative sites vs length of UCE locus. **Lower left**, Average bootstrap support per locus by UCE type vs length of locus. **Lower right**, Average bootstrap support per locus by UCE type. Solid vertical lines are the mean and dashed vertical lines are the median by UCE type.

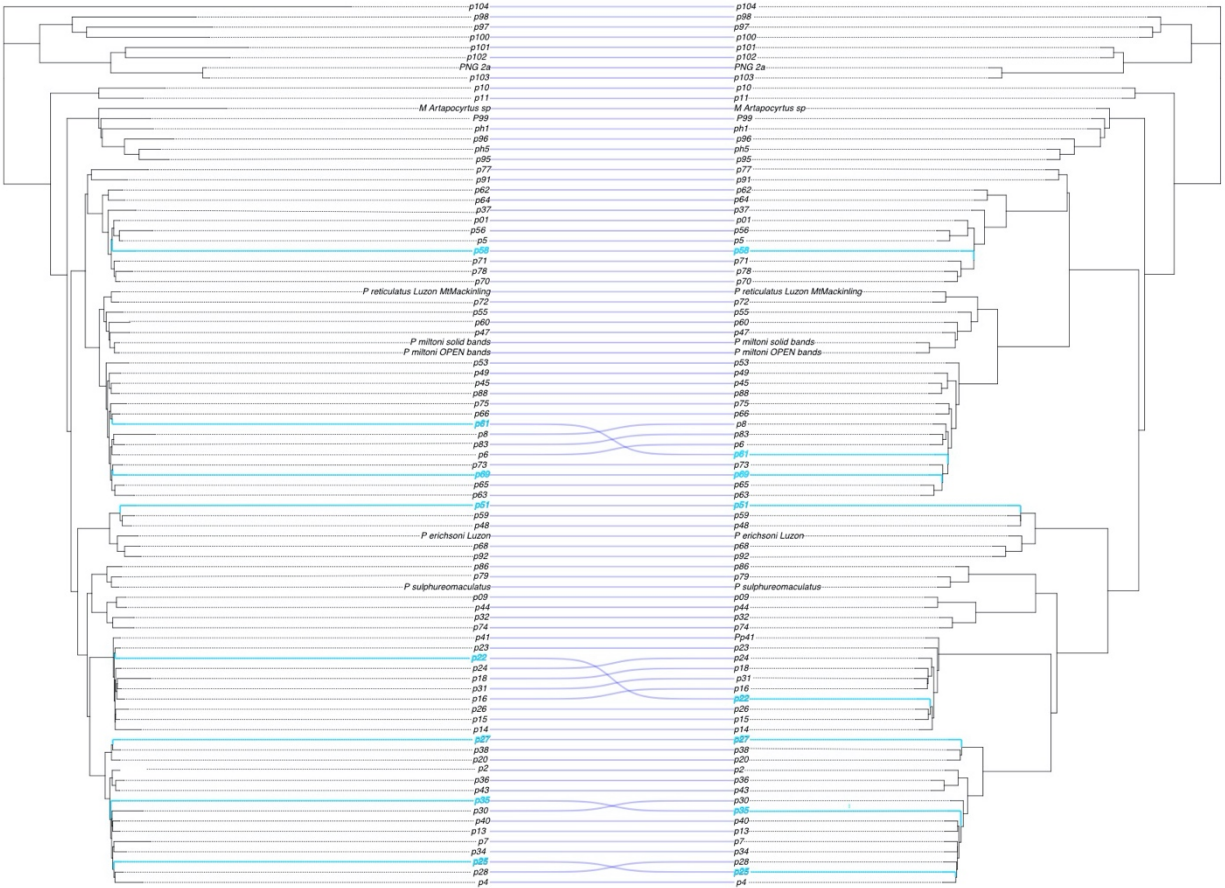

1036  
1037  
1038

Supplementary Figure 3. RAxML concatenated phylogeny on left, ASTRAL species tree on right.

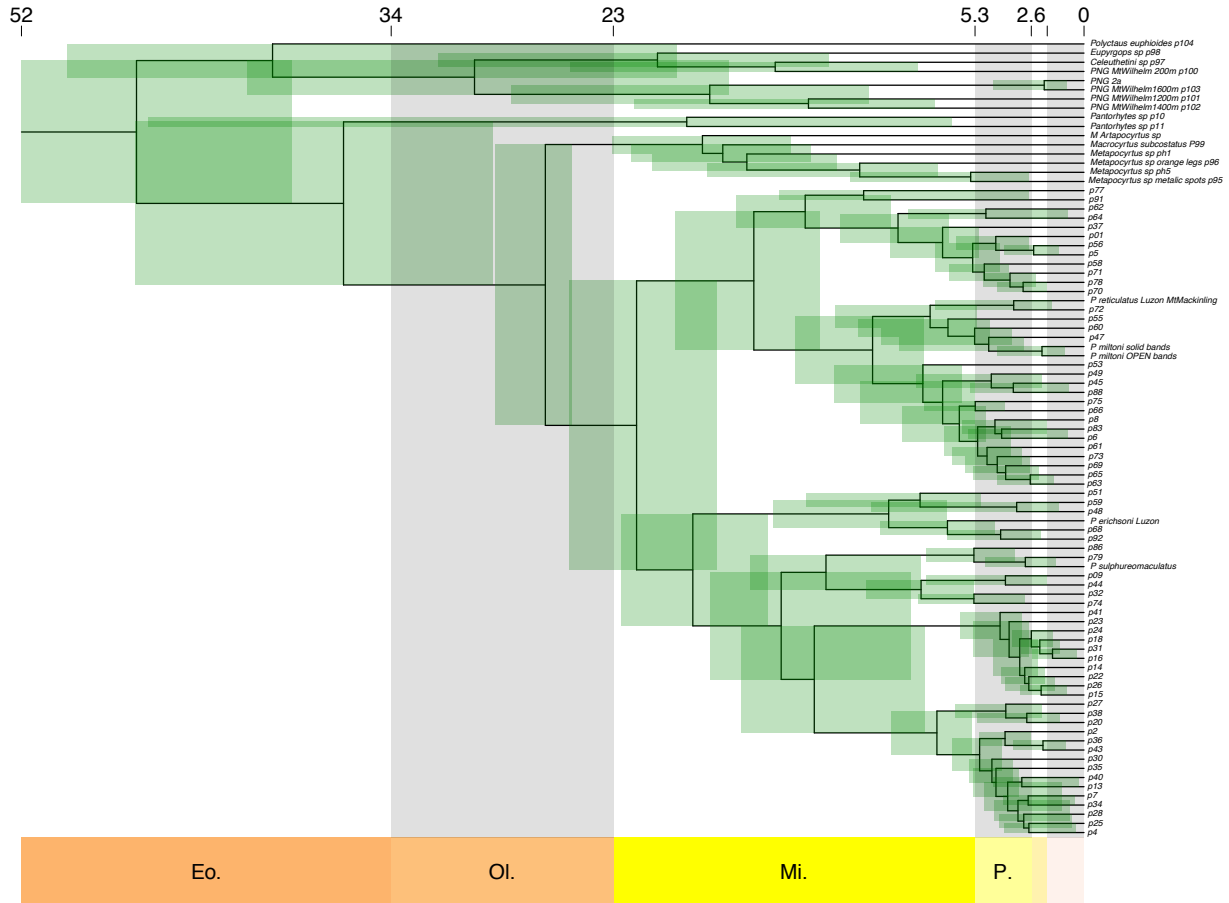

1039

1040

Supplementary Figure 4. *Pachyrhynchus* chronogram constructed using MCMCTREE.

1041

1042

1043 **Nucleotide Models Used:** GTR+I, GTR+G, F81, F81+G, SYM, F81+I, JC, HKY, K80,  
1044 HKY+I+G, K80+I, SYM+G, SYM+I, K80+G, GTR, HKY+G, SYM+I+G, HKY+I, F81+I+G,  
1045 JC+G, GTR+I+G, JC+I, K80+I+G, JC+I+G, TIM, TVM, TVMef, TrN, TrNef, TIM+G,  
1046 TVM+G, TVMef+G, TrN+G, TrNef+G, TIM+I, TVM+I, TVMef+I, TrN+I, TrNef+I, TIM1+I,  
1047 TIM1,TIM1+G

1048

1049
